## 36 **Introduction**

37 Mitoribosomes differ from bacterial and cytosolic ribosomes in their ribosomal RNA (rRNA),  
38 protein content, overall size, and structure. Their formation is an intricate and hierarchical  
39 process involving multiple proteins and a few RNA molecules working in coordination and  
40 under tight regulation (Pearce et al 2017). The cooperative effort involves regulation of two  
41 genomes, because rRNA is encoded by the organellar genome, and almost all the mitoribosomal  
42 proteins and assembly factors are encoded by the nuclear genome and therefore imported from  
43 the cytosol (Couvillion et al 2016). Finally, the fundamental process of the mitoribosomal  
44 assembly is complicated due to the localization of its large subunit (mtLSU) to the inner  
45 mitochondrial membrane. Therefore, stages of assembly were suggested to involve various  
46 mitochondrial *milieu* and specific kinetics (Bogenhagen et al 2014; Antonicka and Shoubridge  
47 2015; De Silva et al 2015). The presence of different compositions is hypothesized to promote  
48 formation of defined pre-mitoribosomal complexes with as-yet-unknown organelle-specific  
49 auxiliary factors.

50 Mitochondria of *Trypanosoma brucei* provide a good model for studying the assembly process,  
51 because their mitoribosomes consist of over a hundred components, and the ratio of protein to  
52 rRNA is unusually high (Zikova et al 2008; Ramrath et al 2018). Since the rRNA forms a  
53 compact core of the mitoribosome, and proteins are mostly peripherally associated, an  
54 architecture based on the reduced rRNA and supernumerary mitoribosomal proteins would need  
55 additional stabilization for its assembly. Therefore, it increases the chances to characterize  
56 defined pre-mitoribosomal complexes, which are not stable enough for biochemical isolation in  
57 mitochondria of other species. Indeed, structural characterization of an assembly intermediate of  
58 the *T. brucei* mitoribosomal small subunit (mtSSU) provided insight into its assembly pathway  
59 with many additional proteins (Saurer et al 2019). However, the assembly of the mtLSU is  
60 poorly understood.

61 The mtLSU accommodates the peptidyl transferase center (PTC) that forms peptide bonds  
62 between amino acids, tRNA binding sites, the L7/L12 stalk that is responsible for the recruitment  
63 of translation factors, the L1 stalk, the central protuberance (CP) that facilitates communication  
64 between various functional sites, and exit tunnel for egress of synthesized protein. In bacteria,  
65 our understanding of the LSU assembly is relatively limited (Davis and Williamson 2017). It  
66 comes primarily from characterization of the final maturation stages (Li et al 2013; Jomaa et al  
67 2014; Ni et al 2016), studies on incomplete LSU particles as a result of protein depletion (Davis  
68 et al 2016), and *in vitro* reconstitution studies with purified ribosomal RNA and protein  
69 components (Nikolay et al 2018). These studies identified different LSU precursors with  
70 assembly factors bound to rRNA components (Davis and Williamson 2017). In mitochondria, the  
71 mtLSU is lacking many of the rRNA components involved in the canonical pathways, and higher  
72 complexity of the interactions between the mitoribosomal proteins at the functional sites has  
73 evolved (Ott et al 2016; Greber and Ban 2016). A functional mtLSU require that the PTC and the  
74 rRNA regions which bind tRNAs are folded, a flexible L1 stalk, an extended L7/L12 protrusion,  
75 and a CP built from multiple mitochondria-specific proteins. However, only the final stage of the

76 mtLSU assembly has been visualized (Brown et al 2017; Itoh et al 2020), and no preceding steps  
77 in the formation of the functional sites have been characterised.

78 To provide insight in the process of the mtLSU assembly, we determined the cryo-EM structure  
79 of a native *T. brucei* mtLSU assembly intermediate (pre-mtLSU) complexed with 16 factors.  
80 Most of the assembly factors have not been previously implicated in mitoribosomal biogenesis.  
81 The structural data suggests that the biogenesis relies on an extensive protein network formed by  
82 assembly factors that connect premature PTC, L1 and L7/L12 stalks with the CP. A homology  
83 search suggests that some of the newly identified assembly factors are also conserved in  
84 mitochondria from other species, including mammals, and therefore may represent a general  
85 principle for the mitoribosome assembly. Comparison with two bacterial assembly intermediates  
86 (Zhang et al 2014; Seffouh et al 2019) further provides insights into the conserved GTPases  
87 EngA and RbgA bound at the subunit interface.  
88

## 89 **Results and Discussion**

### 90 **Structural determination and composition of the native pre-mtLSU complex**

91 We used a *T. brucei* procyclic strain grown in low-glucose medium that maintains translationally  
92 active mitochondria. Mitoribosomal complexes were rapidly purified directly from *T. brucei*  
93 mitochondria and analyzed by single-particle cryo-EM. During image processing, in addition to  
94 intact monosomes, we detected a pool of free subunits. We focused the analysis on this  
95 population and through 3D classification isolated a homogeneous subset of pre-mtLSUs that  
96 corresponded to ~3.5 % of the particles combined from five data sets.

97 896,263 particles were picked using Warp (Tegunov and Cramer 2019), and further processed  
98 using RELION (Kimanius et al 2016; Zivanov et al 2018). We performed reference-based 3D  
99 classification with references generated from a preliminary classification of a screening data set.  
100 This resulted in 207,788 particles corresponding to the mtLSU shape but distinct from that of a  
101 mature mtLSU of which we found 152,816 particles. Refinement of pose assignments and  
102 subsequent classification using fine-angular searches with a solvent mask identified 32,339 pre-  
103 mtLSU particles (Appendix Fig S1). To improve the angles further, the particles were subjected  
104 to masked auto-refinement. Following the CTF refinement, we obtained a reconstruction of a  
105 pre-mtLSU that likely reflects a stable premature complex. This was evidenced by the presence  
106 of densities corresponding to conserved ribosomal assembly factors.

107 The cryo-EM reconstruction was refined to 3.50 Å resolution. This allowed us to build a ~2.2  
108 MDa model and assign 16 assembly factors, as well as additional mitoribosomal proteins,  
109 directly from the density (Fig 1, Fig 2). Five distinct features define the overall pre-mtLSU: 1)  
110 the rRNA domain V is well resolved and covered by newly identified mitochondria-specific  
111 assembly factors; 2) the subunit interface consists almost entirely of newly identified assembly  
112 factors and two conserved GTPases; 3) the proteinaceous CP is absent; 4) the L7/L12 stalk  
113 proteins are missing, and its rRNA platform is not folded, instead assembly factors occupy  
114 similar positions; 5) the L1 stalk is shifted inward ~30 Å and linked to the CP base by assembly

115 factors. Due to these features, compositional and conformational changes are required for the  
116 maturation of the pre-mtLSU. In terms of the mitoribosomal proteins, 18 previously identified  
117 proteins are missing from the structure of the pre-mtLSU. Seven of these have bacterial  
118 homologs (uL10m, uL12m, uL16m, bL27m, bL31m, bL33m and bL36m) and the rest are  
119 mitochondria specific (Fig 1, Appendix Fig S2, Appendix Fig S3). Additionally, we assigned  
120 sequences to two previously unidentified mtLSU proteins, which we named mL109 and mL110,  
121 and observed the presence of mitoribosomal protein uL14m which was not modeled in the  
122 mtLSU (Fig 2).

123 Following the previously identified mitoribosomal small subunit assembly factors (Saurer et al  
124 2019), we adopt a similar nomenclature for the mitochondria specific large subunit factors.  
125 Therefore, we reference them as *T. brucei* Large subunit Assembly Factor(s) (TbLAF1-11),  
126 while proteins with bacterial homologs are referred to as their bacterial names with the prefix  
127 “mt-“. The identified assembly factors of the mitoribosome include two homologs of bacterial  
128 GTPase assembly factors mt-EngA and mt-RbgA, a homolog of the ribosome silencing factor  
129 mt-RsfS, a DEAD-box helicase (TbLAF10), two pseudouridinasases (TbLAF4 and TbLAF6), a  
130 methyltransferase (TbLAF5), two copies of the mitochondrial acyl-carrier protein (mt-ACP), two  
131 LYR-motif-containing proteins (TbLAF1, TbLAF11), and other proteins with previously  
132 unassigned functions (TbLAF2, 3, 7, 8 and 9). In the model, we included only the parts for which  
133 clear secondary structure is apparent, and other regions with only partial density visible were  
134 modeled as UNK1-11 (Supplementary file 2).

135

### 136 **GTPase mt-RbgA is structurally linked to the mitoribosomal core via specific assembly** 137 **linkers**

138 We started the structural analysis by searching for similar assembly intermediate architectures in  
139 bacterial counterparts. Particles with an absent CP were reported previously in RbgA-depleted  
140 *Bacillus subtilis* cells. RbgA was then added *in vitro* and shown to bind to the complex, which  
141 identified its role as an assembly factor (Seffouh et al 2019). RbgA is from the Ras GTPase  
142 family containing a typically low intrinsic GTPase activity, which is increased in the presence of  
143 a mature LSU subunit (Achila et al 2012). It has N-terminal GTPase domain and C-terminal  
144 helical domain, which forms a five-helix bundle (Pausch et al 2018). In the pre-mtLSU structure,  
145 we found a conserved mt-RbgA homolog. Studies in yeasts reported that deletion of mt-RbgA  
146 (yeast Mtg1) results in respiration deficiency (Barrientos et al 2003). In *B. subtilis*, where this  
147 assembly factor is essential, the LSU:RbgA complex showed that the N-terminal domain  
148 overlaps with rRNA H69 and H71, and the C-terminal helical domain interacts with H62 and  
149 H64 (Seffouh et al 2019). In this position, RbgA displaces the P-site and interacts with the  
150 surrounding rRNA, including H92 and H93. Therefore, the binding of RbgA requires contacts  
151 with rRNA.

152 In our map of the *T. brucei* pre-mtLSU, the corresponding regions forming the rRNA binding  
153 site for mt-RbgA are not observed, and its nucleotide binding site empty (Fig 3b). However, the



154 comparison of our structure with the *B. subtilis* LSU:RbgA complex (PDB ID 6PPK) shows  
155 conserved position of the catalytic site and nearly identical conformation of the factor on the pre-  
156 mtLSU complex (Fig EV1). This includes the weak interaction between the mt-RbgA C-terminal  
157 domain and the mitoribosomal protein uL14m is conserved (Fig 3).

158 We found that the conserved position of mt-RbgA in *T. brucei* is maintained through two  
159 specialized assembly linkers (Fig 3). The first linker is established between the C-terminal  
160 domain and the TbLAF5 N-terminal helix. The latter adopts a crescent shape around the C-  
161 terminal domain of mt-RbgA, forming a series of contacts with four out of its five helices (Fig  
162 3). The second linker is provided by TbLAF4 approaching from the mitoribosomal core. It  
163 interacts with the mt-RbgA C-terminal domain and contributes a  $\beta$ -strand to a shared  $\beta$ -sheet  
164 (Fig EV2). Therefore, RbgA is anchored to the flexible core via two dedicated factors that  
165 compensate for the lack of rRNA contacts.

166 TbLAF4 belongs to a family of site-specific RluD pseudouridine synthases which are involved in  
167 the bacterial LSU assembly and responsible for creation of pseudouridines at positions 1911,  
168 1915 and 1917 (*E. coli* numbering) in the H69 end-loop (Gutgsell et al 2001; Gutgsell et al  
169 2005). In pre-mtLSU structure, TbLAF4 encircles the immature rRNA nucleotides U1017-  
170 U1021 and G1073-U1087 (Fig 4), and its active site is occupied by uridine 1017 likely present in  
171 H89-93 of the mature rRNA (Fig EV2B). The N-terminal domain is positioned at the distance of  
172  $\sim 80$  Å facing towards the L7/L12 stalk. This connection plays a key role in coordinating the  
173 factors between the different functional sites (Fig 5A).

174 TbLAF5 belongs to the family of SpoU RNA methyltransferases, but appears to have a closed  
175 active site that does not allow the binding of its typical S-adenosyl methionine cofactor (Fig  
176 EV2A). It is located peripherally, and bound to the mitoribosome via a C-terminal 24-residue  
177 helix interacting with rRNA H41/42, and via contacts with TbLAF8 (Fig EV2).

178 Together, TbLAF4 and TbLAF5/TbLAF8 perform a structural scaffolding role for binding mt-  
179 RbgA. A homology search of the assembly factors reveals that TbLAF4 and TbLAF5 are also  
180 present in vertebrates, plants, fungi and ciliates (Fig 5C). Since their genomes encode mt-RbgA  
181 as well, our data suggests that a cooperative action of the assembly factors might be conserved.

182

### 183 **GTPase mt-EngA is stabilized via protein extension**

184 In the subunit interface, we identified another conserved GTPase homolog, mt-EngA. It contains  
185 two GTPase domains arranged in tandem as well as a C-terminal K homology (KH) domain  
186 which is pointed towards the PTC. We could model two GTPs in the GTPase domains (Fig 3B).  
187 Its positioning is identical to bacteria, suggesting functional conservation. The assembly factor  
188 occupies the space between the PTC and the E-site (Fig EV1), and a role in chaperoning rRNA  
189 has been proposed (Zhang et al 2012). The comparison with *E. coli* LSU:EngA complex reveals  
190 conformational differences that highlight the nature of the mitochondrial protein-rich system, and  
191 its role in the stabilization of the conserved assembly factors.

192 Firstly, the N-terminal GTPase domain is extended by 60 residues, with residues 101-108  
193 stabilizing a helix-turn-helix motif (275-305), which remained unresolved in the bacterial  
194 complex (Fig EV1B). The N-terminal extension is generally present in mitochondria from other  
195 species (Fig EV3B, Appendix Figure S4). This motif is important for the stabilization of EngA,  
196 because one helix is stacked against a helix of TbLAF10, whereas the other forms a helical  
197 bundle with TbLAF11 (Fig EV3). TbLAF10 is one of the largest mitoribosomal assembly  
198 factors, which spans 110 Å through the rRNA core to the CP (Fig 3, Fig 5). It has an rRNA  
199 contact area of ~8400 Å and keeps the nucleotides U904-A917 as well as U953-A965 (putative  
200 H80-83) in a premature conformation (Fig 4).

201 Secondly, the N-terminal residues 72-75 of EngA stabilize a short helix (residues 367-374),  
202 which is buried within rRNA groove via Arg367 and Arg369 (Fig 3b). It disrupts the local  
203 structure of H75 and stabilizes the flipped nucleotide A894. This loop is also highly charged in  
204 the corresponding *E.coli* structure, but does not adopt the helical conformation observed here.  
205 Finally, the N-terminus forms additional contacts with five mitoribosomal proteins (bL28m,  
206 bL35m, bL19m, mL64, mL74), a stabilizing protein mass that compensates for the missing  
207 rRNA in this region. Overall, while the N-terminal GTPase domain aligns well with the bacterial  
208 EngA, its interacting partners in our structure are proteinaceous and specific to mitochondria.

209 The conserved globular domains of mt-EngA are associated with the pre-mtLSU core via  
210 TbLAF9. Its three helices from the N-terminus encloses the N-terminal GTPase domain helix  
211 230-242 (Fig EV3). Here, TbLAF9 replaces the missing rRNA H82, H88 and protein L1, which  
212 binds the EngA N-terminal GTPase domain in bacteria. TbLAF9 spans over 100 Å to the top of  
213 the CP, where it also stabilizes unwound rRNA (Fig 4, Fig 5). Thus, mt-EngA is stably bound  
214 via protein extension and also associated with the protein-based scaffold of assembly factors,  
215 including the high molecular weight TbLAF9 and TbLAF10, which are connected to the CP.

216

### 217 **The module mt-RbgA:mt-EngA coordinates maturation of interfacial rRNA**

218 The process of the LSU assembly is dynamic with cooperative action of different assembly  
219 factors (Davis et al 2016; Davis and Williamson 2017). Although RbgA and EngA have  
220 previously been visualized separately on the bacterial LSU through deletion and reconstitution  
221 experiments, our cryo-EM structure shows both factors simultaneously associated with the mt-  
222 LSU and with each other. The presence of both factors rationalizes why rRNA domain V is  
223 better resolved than in the mature mtLSU (Fig 4, Fig 6). We were able to model 33% more  
224 nucleotides relative to the mature LSU, thereby showing that the H89-93 region does not occupy  
225 the expected bacterial position and highlighting a need for prominent remodeling during  
226 maturation (Fig 6, Appendix Fig S5).

227 The contacts between mt-RbgA and mt-EngA are formed between the N-terminal domain and  
228 KH domains, respectively (Fig 3b). The shared surface area is ~540 Å, and each of the domains  
229 is also associated with conserved rRNA. The formed contacts between mt-RbgA and mt-EngA  
230 include electrostatic interactions, as well as hydrophobic residues (Fig 3b). Since the structures

231 and positions of both factors are conserved with bacteria, and we identified homologs in  
232 representative eukaryotic species, these results indicate that the simultaneous binding and overall  
233 mode of interaction might be conserved in mitochondria of different organisms, including  
234 humans.

235

### 236 **Progressive maturation of the L7/L12 stalk**

237 The L7/L12 stalk is a universal mobile element that associates translational protein factors with  
238 the A-site. It typically consists of the rRNA platform that connects to the flexible factor-  
239 recruiting series of bL12m copies. The ubiquitous ribosomal proteins uL10m, uL11m and  
240 mitochondria-specific mL43 link the different components together. In our structure, most of the  
241 protein constituents of the stalk are missing and others adopted conformational changes (Fig 7A).

242 In the region of the platform, at least three proteins (uL16m, bL36m, mL88) associated with the  
243 rRNA in the mature mtLSU are absent. Consistently, the rRNA platform is not folded, as the  
244 folding relies on the missing mitoribosomal proteins. Instead, the N-terminal domain of TbLAF4  
245 extends from the subunit interface to occupy part of the space left by uL16m absence (Fig 7A  
246 and B). It binds two specific assembly factors TbLAF2 and TbLAF7. TbLAF2 mediates further  
247 contacts with the core of the pre-mtLSU. TbLAF7 consists of 7-stranded beta-barrel, 12  $\alpha$ -  
248 helices, and 63-residue tail inserted into the mitoribosomal core. The structure suggests that both  
249 TbLAF2 and TbLAF7 need to dissociate for the missing mitoribosomal proteins to assemble (Fig  
250 7A).

251 In the factor-recruiting region, instead of the terminal bL12m copies, TbLAF3 and density  
252 corresponding to UNK6 form a protrusion (Fig 7A). They comprise a protein continuum of at  
253 least 13 helices associated with each other. This assembly is the attached to the platform region  
254 through a 30-residue C-terminal tail of TbLAF3, forming a helical bundle with mL75 (Fig 7A,  
255 7C). Overall, this protein module extends  $\sim 70$  Å from the core in a similar fashion to the L7/L12  
256 stalk, and both appear to be mutually exclusive.

257 The position of the uL10m N-terminus, which links the stalk to the body in the mature LSU, is  
258 occupied by TbLAF3 C-terminus. It interacts with mL43, resulting in its helix being bent by  $90^\circ$   
259 (Fig 7B). This conformational change and the lack of uL10m is correlated with  $\sim 15$  Å shift of  
260 uL11m to occupy the formed void (Fig 7B). Nevertheless, TbLAF3 is only peripherally  
261 associated with mL43, and it cannot be excluded that the protrusion is independently replaced by  
262 the mature L7/L12 stalk.

263 Together, our structure proposes a working model for the L7/L12 stalk maturation via five steps  
264 which include dismantling, remodeling and assembly (Fig EV5): 1) TbLAF4, which is extended  
265 from the subunit interface anchoring mt-RgbA, has to be removed; 2) TbLAF2:TbLAF7 is  
266 released from the ribosomal core; 3) rRNA platform is folded, and mitoribosomal proteins  
267 uL16m, bL36m, and mL88 are recruited to the rRNA platform; 4) TbLAF3:TbLAF5 is removed,  
268 and uL11m, mL43 adopt their mature conformations; 5) bL10m and bL12m stalk proteins are  
269 associated to form the functional L7/L12 stalk.

270 Below the L7/L12 stalk we identified three additional proteins: an ortholog of the bacterial  
271 ribosome silencing factor mt-Rsf, a LYR (leucine-tyrosine-arginine) motif containing protein  
272 TbLAF1, as well as an associated mt-ACP (Fig 1, Fig 5). The human and fungi mitochondrial  
273 counterparts of these three proteins have been shown to be involved in late assembly stages of  
274 the mitoribosome, preventing association of the mtSSU (Brown et al 2017; Itoh et al 2020). In  
275 our structure, the module is further stabilized by mL85, however it does not appear to obstruct  
276 the binding of the mature mtSSU, likely because of the reduced rRNA and different overall  
277 shape. This suggests that in order for the mtACP:TbLAF1 protein module to act according to the  
278 previously suggested mechanism, a complementary structural domain from pre-mtSSU would be  
279 required for a steric hindrance.

280

### 281 **Assembly of the CP is linked to the subunit interface and L1 maturation via mt-ACP**

282 The most prominent architectural feature of the pre-mtLSU complex is the absence of the CP. It  
283 is a universal ribosomal element that defines the shape of the LSU and forms bridges with the  
284 SSU head. In mitoribosomes, the CP is particularly protein-rich (Amunts et al 2014; Greber et al  
285 2014; Amunts et al 2015; Greber et al 2015; Waltz et al 2020; Tobiasson and Amunts 2020). The  
286 acquisition of the CP mitochondria-specific proteins took place in the early evolution of the  
287 mitoribosome and therefore expected to be conserved (Petrov et al 2019).

288 In the pre-mtLSU, all the CP mitoribosomal proteins are missing and the high molecular weight  
289 assembly factors TbLAF6 (69 kDa) and TbLAF9 (67 kDa) are present (Fig 1, Fig 8A). TbLAF6  
290 binds on the solvent side of the CP covering the otherwise exposed rRNA, which only engages in  
291 limited base pairing. This assembly factor is annotated as a putative TruD family pseudouridine  
292 synthase. However, in our structure, it displays a two-strand antiparallel  $\beta$ -sheet near the catalytic  
293 site protruding into the ribosomal core interacting with four mitoribosomal proteins (uL15m,  
294 bL28m, bL35m, mL74) (Fig 8B). TbLAF9 is an exclusively helical protein, comprised of at least  
295 29 helices. It binds on top of the rRNA, providing an additional protective protein cap (Fig 8A).  
296 Two of the TbLAF9 helices interface with a four-helix bundle, which we identified as mt-ACP  
297 (mt-ACP2) with a local resolution of 3.5 Å (Fig 2). Since mt-ACP proteins are known to form  
298 interactions with Leu-Tyr-Arg (LYR)-motif proteins, we compared the mt-ACP1-TbLAF1  
299 module from the subunit interface with the CP mt-ACP2 region (Fig 8C). The helices of the  
300 LYR-motif protein TbLAF1 aligned well with a density corresponding to three helices associated  
301 with the mt-ACP2. The interactions in both cases are mediated by the 4'-phosphopantetheine (4'-  
302 PP) modification of mt-ACP, resembling the canonical interactions between mt-ACP and the  
303 LYR-motif proteins. The 4'-PP appears to be acylated as indicated by the density but the exact  
304 length of the acyl chain cannot be unambiguously determined from the density (Fig 8C).  
305 The presence of the 4'-PP modification, previous structural data (Zhu et al 2015; Fiedorczuk et al  
306 2016; Brown et al 2017), and the overall shape of the associated density suggest that the  
307 interacting partner of mtACP2 is a protein from the LYR-motif family containing at least three  
308 helices. Therefore, we searched our current and previously published (Zikova et al 2008) mass

309 spectrometry data using ScanProsite (de Castro et al 2006). The hits were subjected to the  
310 secondary structure prediction and fitting to the density map. The analysis singled out the protein  
311 Tb927.9.14050 (UniProt ID Q38D50), which we named consistently with the adopted  
312 nomenclature TbLAF11. The local resolution of 3.5–4.0 Å in this region (Fig 2) allowed for 164  
313 N-terminal residues to be built (Supplementary File 2), which includes the three helices  
314 associated with the mtACP2 in proximity to the L1 stalk, and two helices interacting with EngA.  
315 The importance of the mt-ACP2:TbLAF11 protein module in our structure is of twofold. First, it  
316 directly binds the L1 stalk and locks it in an inward facing nonfunctional conformation (Fig 1).  
317 Second, it is involved in mt-EngA stabilization by forming a U-shaped continuum from TbLAF9  
318 on the solvent side of the CP to the subunit interface (Fig 1, Fig 5). Therefore, it contributes to  
319 the protein network connecting between the various functional sites. Our data suggests that mt-  
320 ACP2 is a principal partner in the mitoribosomal assembly pathway. In the pre-mtSSU, mt-ACP  
321 was also identified as one of the assembly factors (Saurer et al 2019). In addition, ACPs in  
322 mitochondria act as subunits of the electron transport chain (Zhu et al 2015; Fiedoreczuk et al  
323 2016) and Fe-S cluster assembly complexes (Van Vranken et al 2016). This further supports the  
324 proposed concept that mt-ACPs could be signaling molecules in an intramitochondrial metabolic  
325 state sensing circuit (Masud et al 2019).

326 At the CP, the assembly factors cooperatively bind unwound rRNA nucleotides U934-U953  
327 (H83) (Fig 5, Fig 8A). Remarkably, the rRNA forms a loop 25 Å in diameter that contains the  
328 TbLAF6 β-sheet and mL64 C-terminal helix, both inserted from the opposite directions (Fig 8B).  
329 The conserved helix of mL64 is shifted in our pre-mtLSU structure ~30 Å from the final location  
330 on the mature LSU, where it aligns the E-site. Interestingly, this is also one of the most  
331 conserved mitoribosomal proteins across species (Petrov et al 2019). To switch to the conserved  
332 and mature position, the extended C-tail of mL64 has to liberate from the rRNA loop and then  
333 undergo a large conformational shift towards the L1 stalk. Subsequently, the C-tail is inserted to  
334 its mature position, where it contacts CP components absent from the assembly intermediate.  
335 Since the L1 stalk is also shifted, the maturation towards a mature LSU is likely to occur in a  
336 concerted manner upon the release of the mt-ACP2:TbLAF11 module.

337

### 338 **Conclusions**

339 Our structure of pre-mtLSU in complex with 16 assembly factors reveals that high molecular  
340 weight assembly factors shield the rRNA and form a network that spans over 180 Å, which  
341 connects the subunit interface with the progressive maturation of the L7/L12 stalk, L1 stalk, and  
342 the assembly of the CP. The tight binding of the mt-ACP2 with partner proteins emphasizes its  
343 role in forming the connections. The factors mt-RbgA and mt-EngA are held together by protein  
344 linkers and interact with each other. The analysis shows that most of the assembly factors are  
345 also found in mammals. Overall, the protein-based communication allows the formation of the  
346 defined pre-mitoribosomal complex with newly identified factors that provides a conceptual  
347 model how mtLSU can progress through the biogenesis pathway.



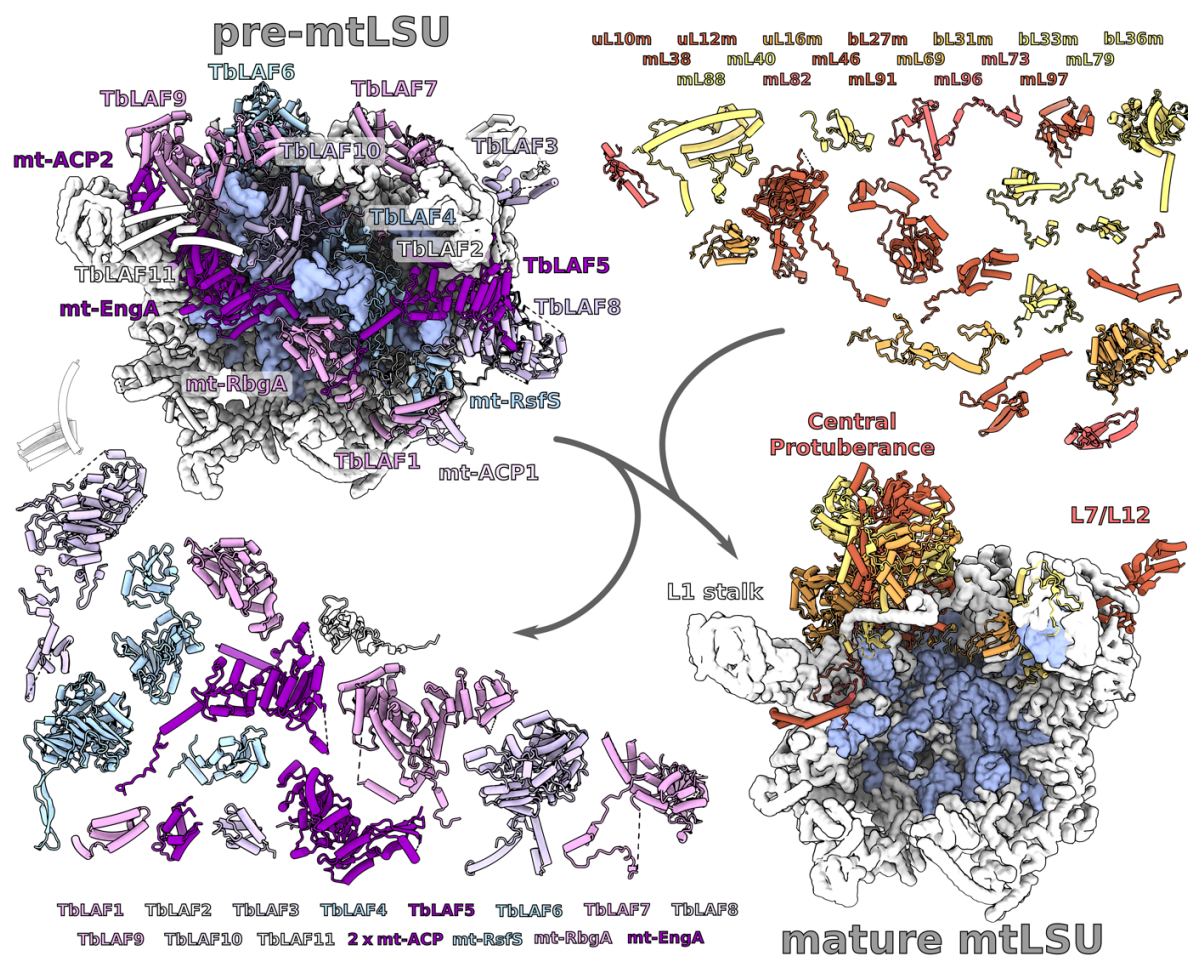

348

349

350

351

352

353

354

**Figure 1. Structure of *T. brucei* pre-mtLSU with 16 assembly factors.** Left, the overall modeled structure of the pre-mtLSU (rRNA blue) with models of assembly factors (shades of purple and white) covering the subunit interface, CP, L7/L12 stalk and connecting to the L1 stalk. Right, structure of the mature mtLSU (PDB ID 6HIX) with 18 additional mitoribosomal proteins (shades of orange) absent from pre-mtLSU.



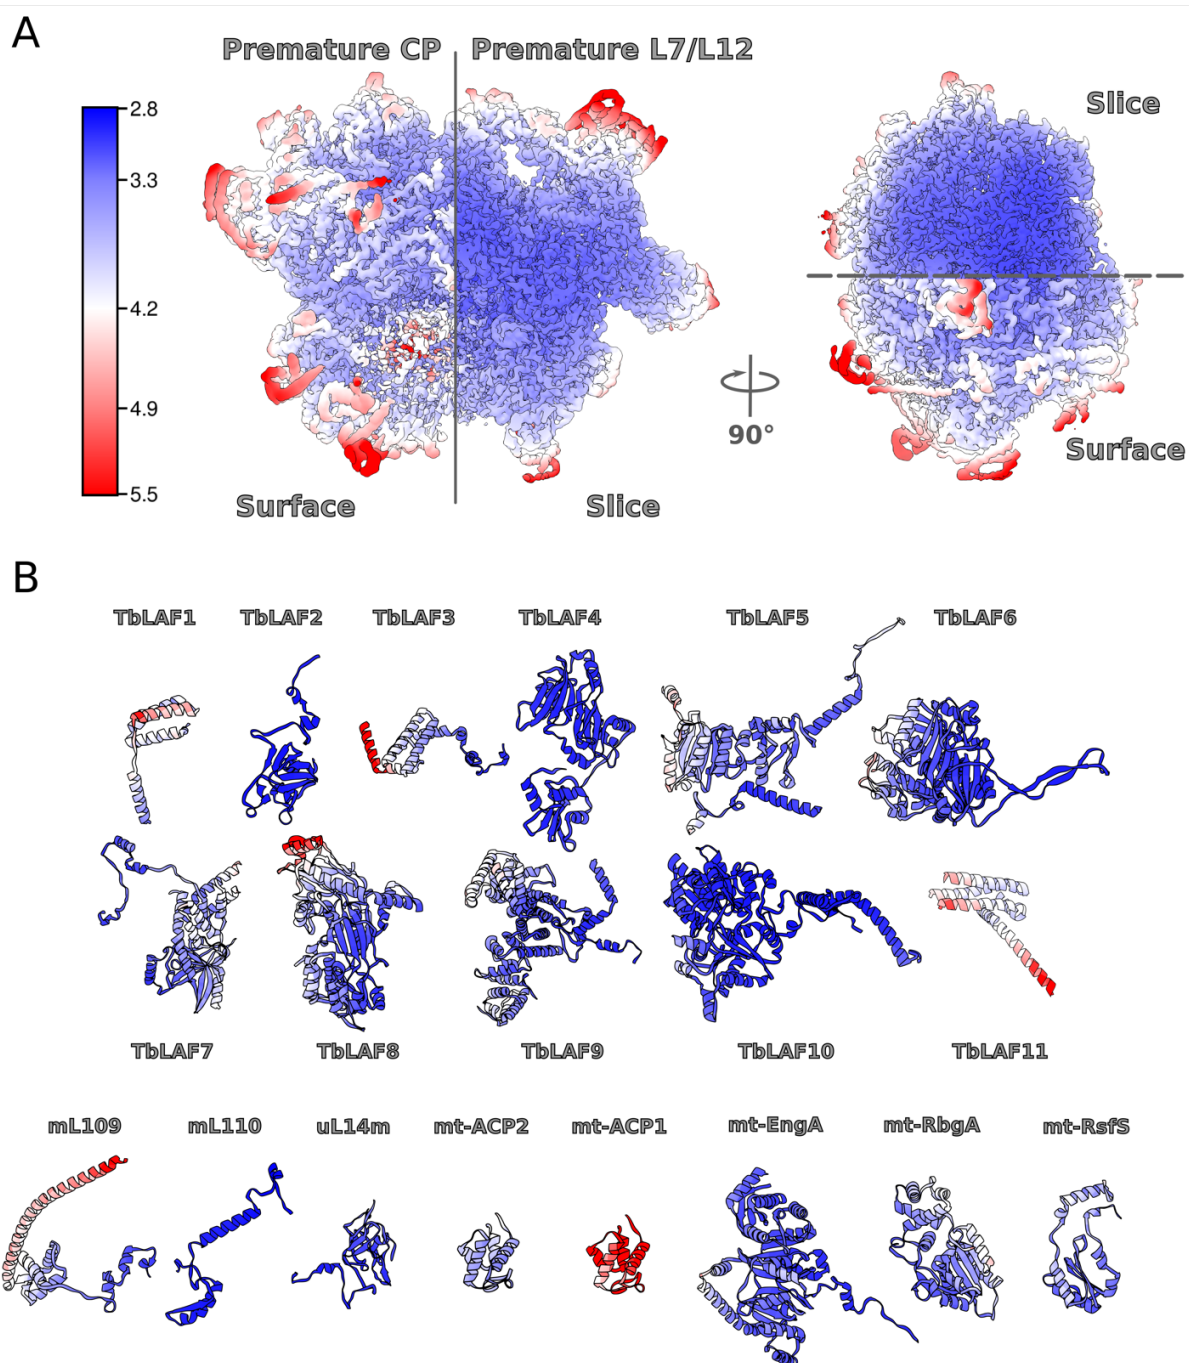

355  
356 **Figure 2. Cryo-EM data quality.** (A) Final map colored by local resolution. (B) Models for  
357 individual assembly factors and newly identified proteins colored by local resolution of the  
358 density in the corresponding regions.  
359

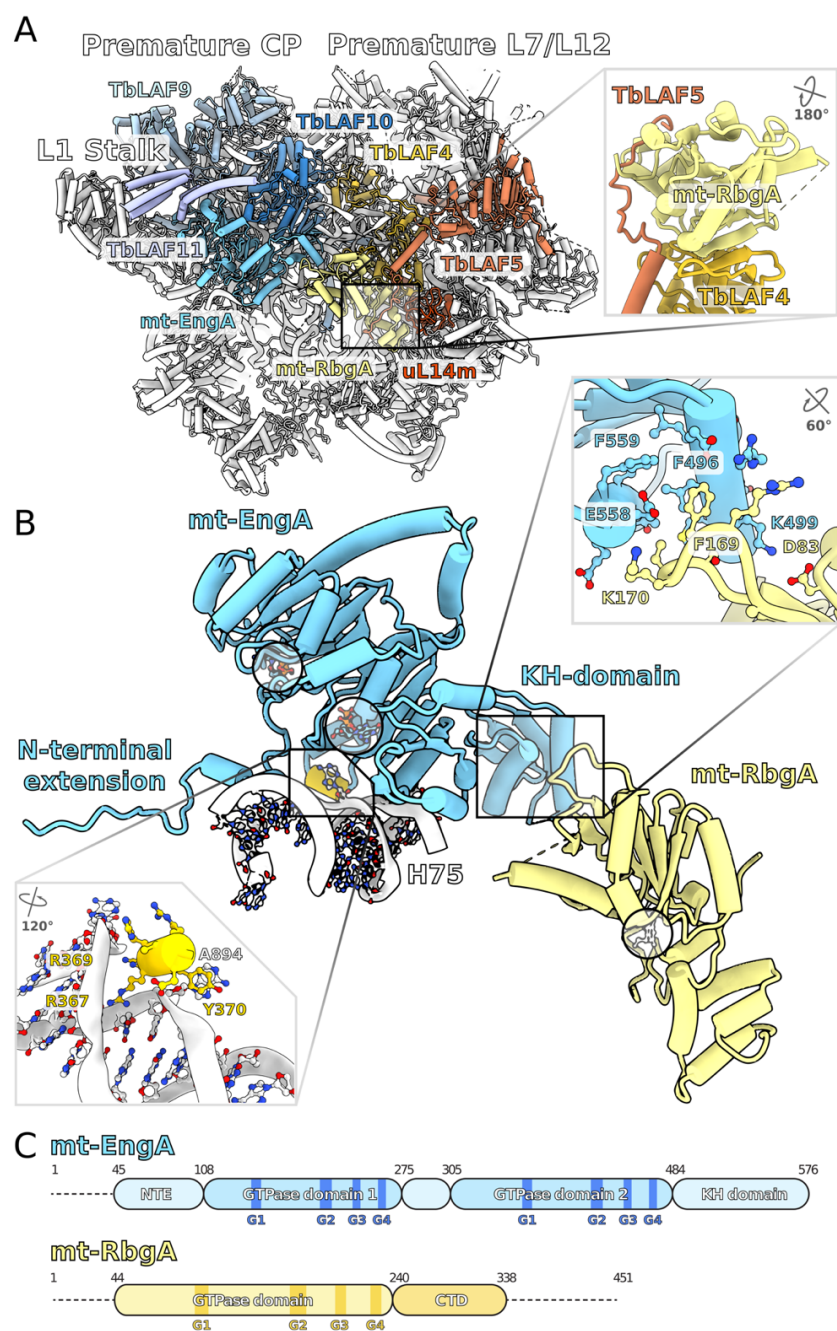

360  
 361 **Figure 3. Binding of the mt-RbgA and mt-EngA to the subunit interface.** (A) mt-RbgA is  
 362 bound to TbLAF4 and TbLAF5, which are connected to the L7/L12 stalk; mt-EngA is associated  
 363 with TbLAF9 and TbLAF10, which are connected to the CP. (B) A short helix of mt-EngA  
 364 (yellow) interacts with a flipped A894 nucleotide from H75 (white). Two GTPs in their binding  
 365 sites on mt-EngA are shown as sticks. A superimposed GTP in its binding site on mt-RbgA is  
 366 shown in as white sticks. The residues forming interactions between mt-EngA and mt-RbgA are  
 367 shown in the top right inset. (C) Schematic representation of mt-EngA and mt-RbgA indicating  
 368 the positions of the conserved GTP binding motifs.

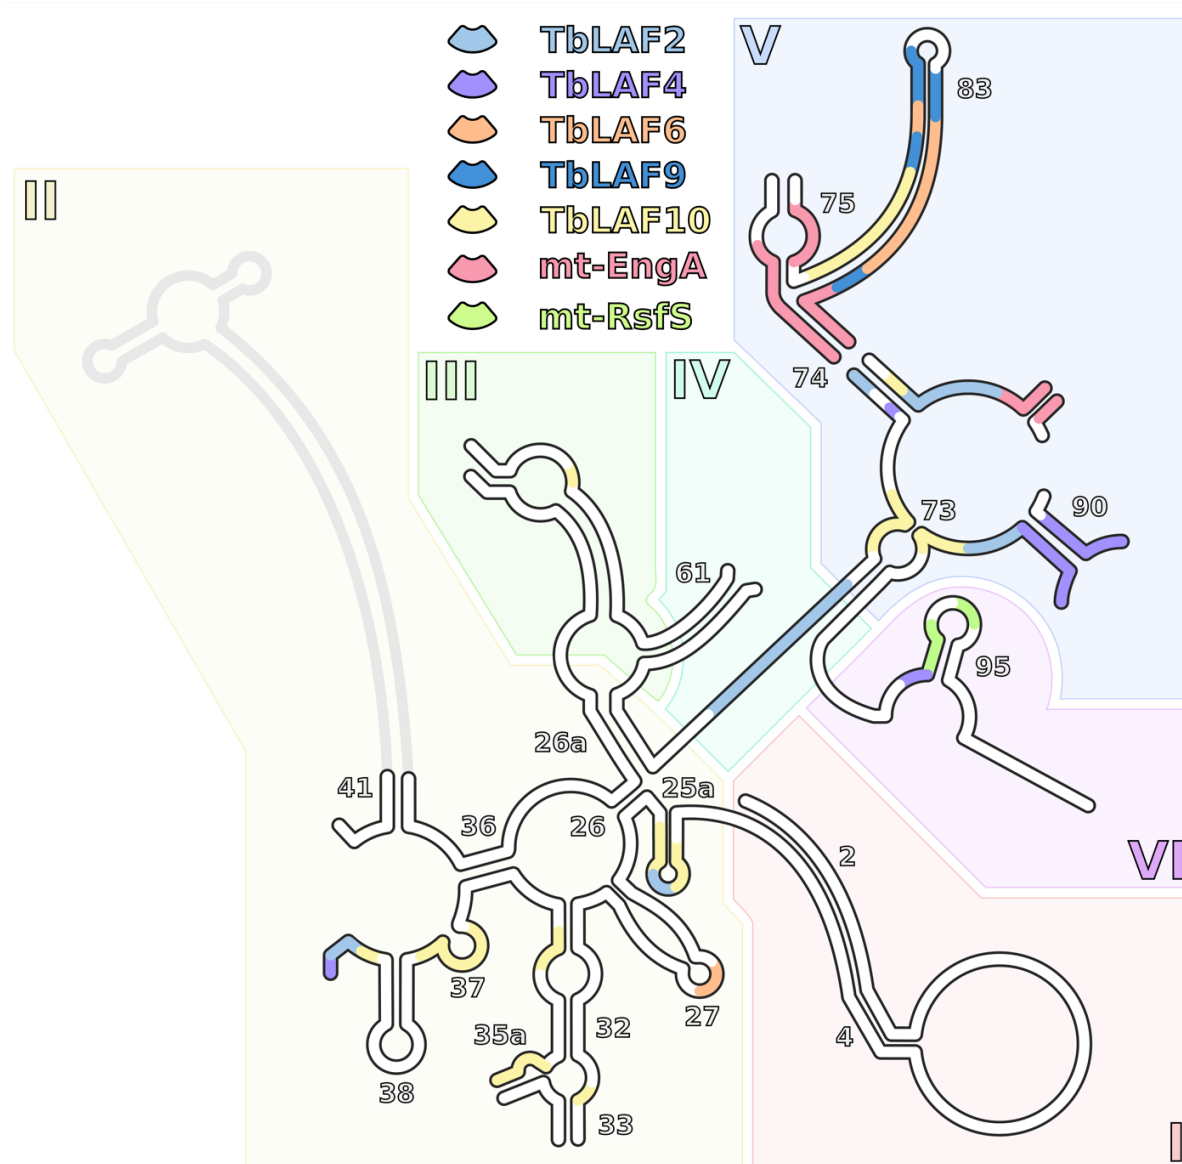

369  
370 **Figure 4. Schematic representation of assembly factors' binding to rRNA mapped on the**  
371 **secondary structure diagram.** The rRNA regions contacting individual assembly factors are  
372 represented by different colors. Bound regions of at least 3 nucleotides are shown. For regions  
373 where more than one factor is bound, only a factor with higher local binding is shown. Unbound  
374 rRNA is white, unmodeled rRNA is grey.  
375

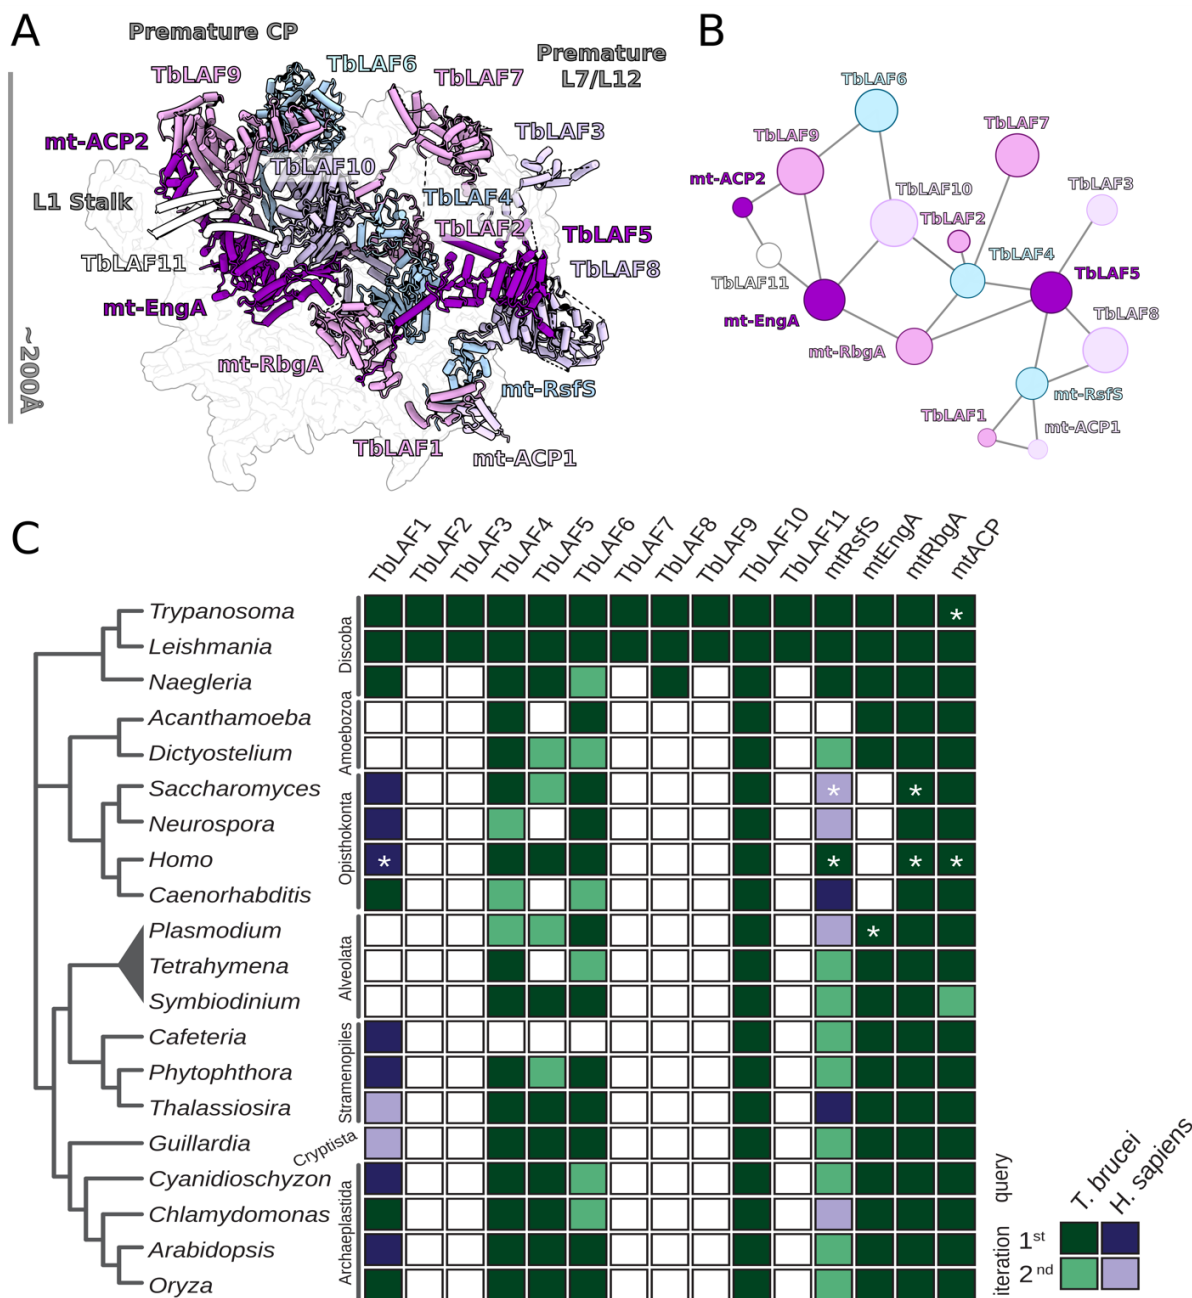

376

377 **Figure 5. Network of interactions between the assembly factors in pre-mtLSU. (A)**

378 Assembly factors shown on the background of the pre-mtLSU density map, featuring the

379 interconnection. (B) Schematic of protein-protein network. The node size represents the relative

380 molecular mass of the protein. All the assembly factors are interconnected with each other. (C)

381 Homology search of the assembly factors. Colored squares indicate identified

382 homologs/orthologs using *T. brucei* (green) or human (purple) assembly factors as queries.

383 White squares indicate not-identified homologs/orthologs. The stars mark proteins, for which

384 experimental data has been reported.



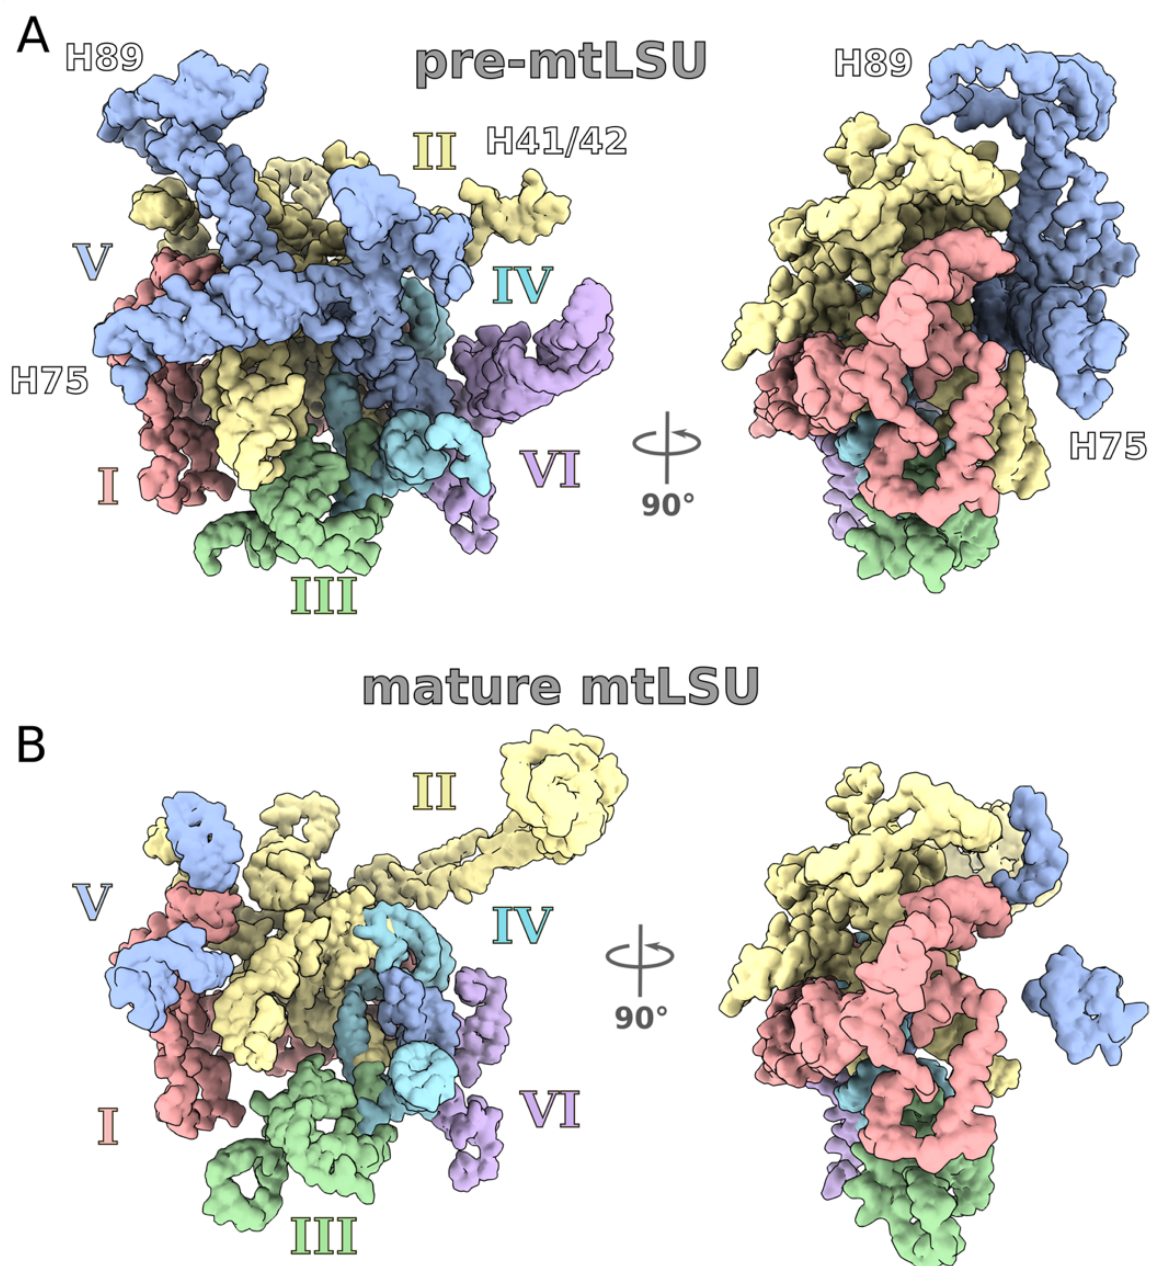

385  
386 **Figure 6. Tertiary structure of rRNA in pre-mtLSU (A) and mature mtLSU (B).** Shown  
387 from the subunit interface (left) and sideview (right). Two views of rRNA related by 90° are  
388 shown with each domain in a different color. Domain V is more structured in pre-mtLSU, and  
389 H89-93 adopt a different conformation. Domain II that is responsible for L7/L12 stalk is largely  
390 disordered.  
391

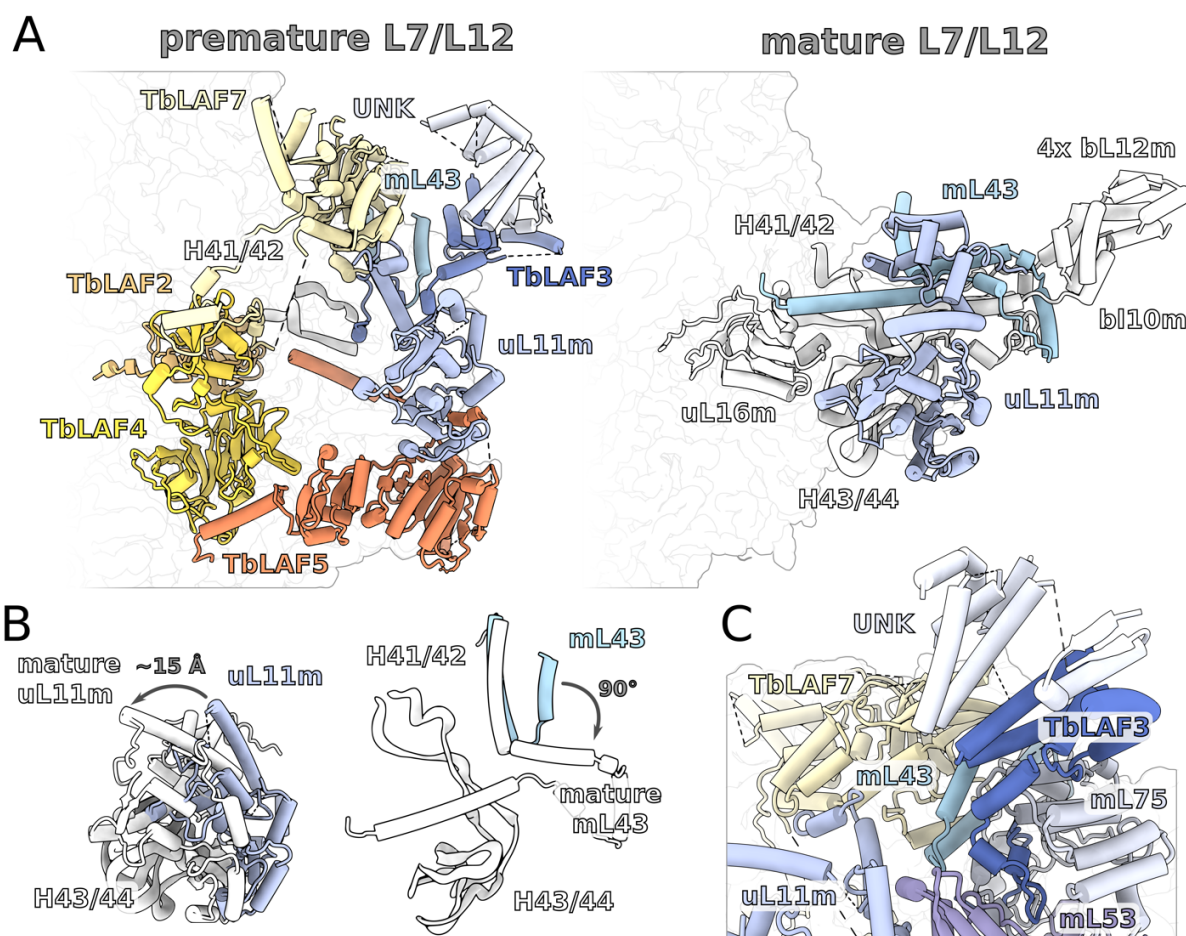

392  
 393 **Figure 7. Assembly of the L7/L12 stalk.** (A) In pre-mtLSU, TbLAF4 extends from the subunit  
 394 interface to occupy the position of uL16m in the mature mtLSU. TbLAF2 and TbLAF7 are  
 395 bound at the stalk base to the unfolded rRNA H41/42. TbLAF3 and additional protein form a  
 396 protrusion similar to bL10m:bL12m. Other mitoribosomal protein removed for clarity. (B)  
 397 Conformational changes from pre-mtLSU (green) to mature mtLSU (white) include mL43 and  
 398 uL11m. (C) TbLAF3, mL75, and UNK protein form continuum of at least 13 helices that is  
 399 peripherally associated. (D) Model for the L7/L12 stalk maturation.



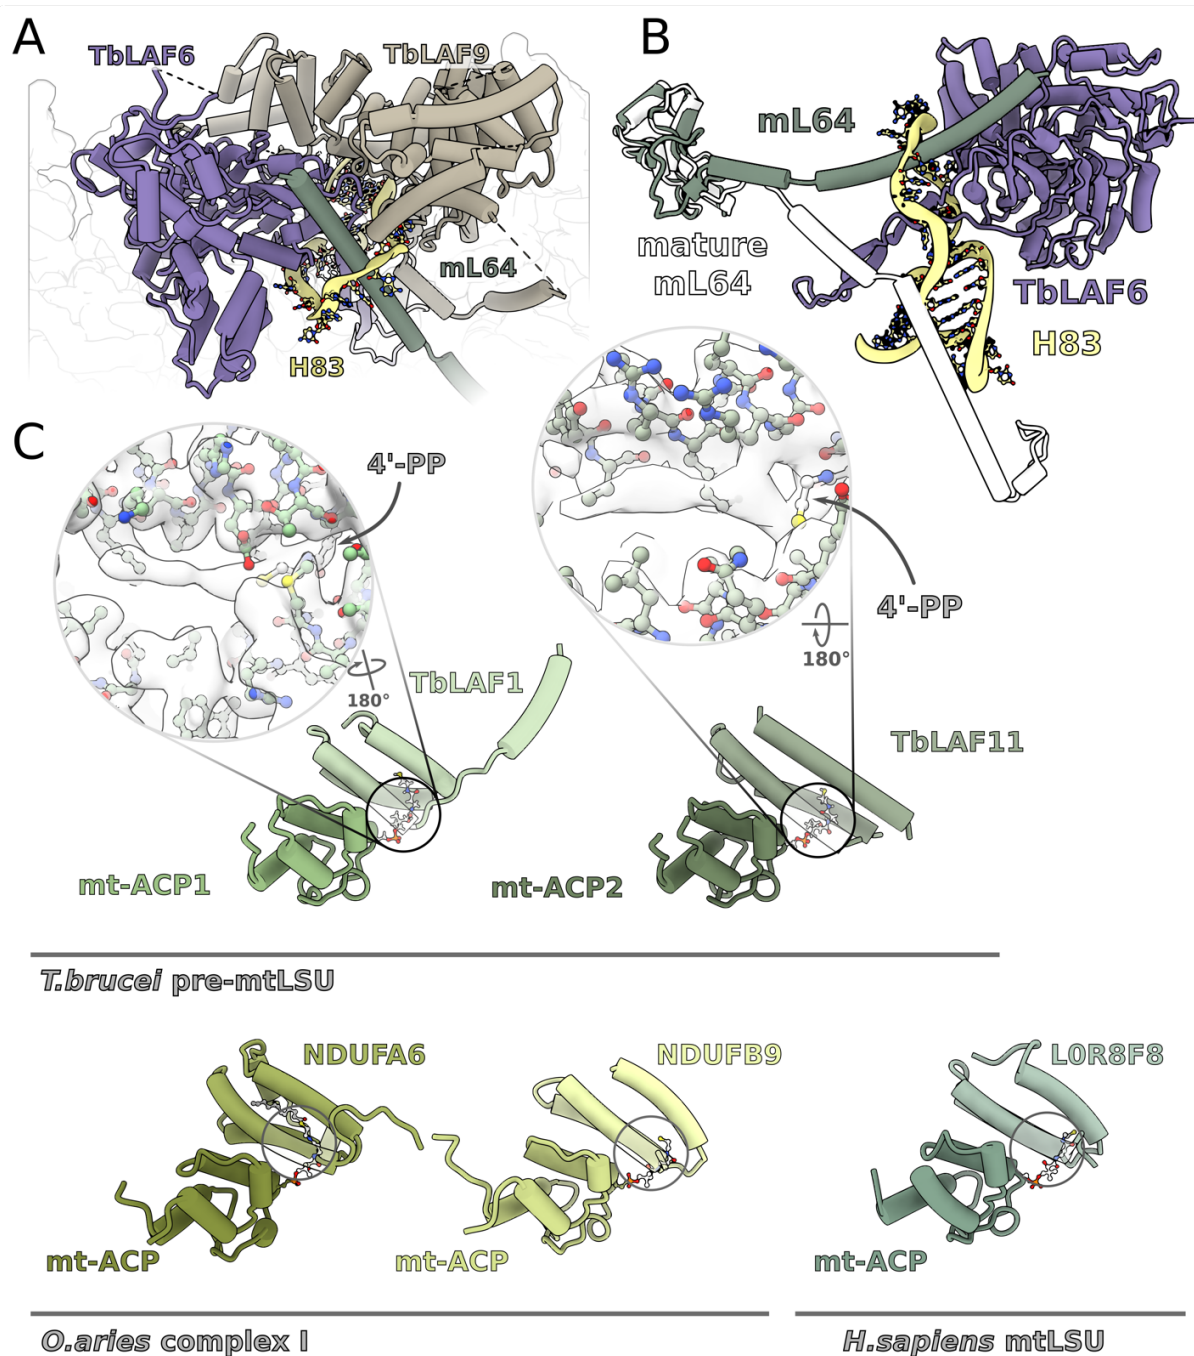

400  
401 **Figure 8. The CP assembly intermediate.** (A) TbLAF6 and TbLAF9 form the CP in the pre-  
402 pre-mtLSU. (B) TbLAF6 and mL64 elements are inserted through rRNA loop corresponding to H83.  
403 Conformational change of mL64 from pre-mtLSU to mature mtLSU (white) is indicated. (C)  
404 Comparison between the mt-ACP1:TbLAF1 (left) and the CP mt-ACP2:TbLAF11 region (right).  
405 The density (white) for acylated 4'-PP is indicated. Bottom panel, comparison with mt-ACP and  
406 associated LYR-motif proteins from complex I (PDB ID 5LNK) and human mitoribosome (PDB  
407 ID 5O0M) shows the canonical interactions.

408

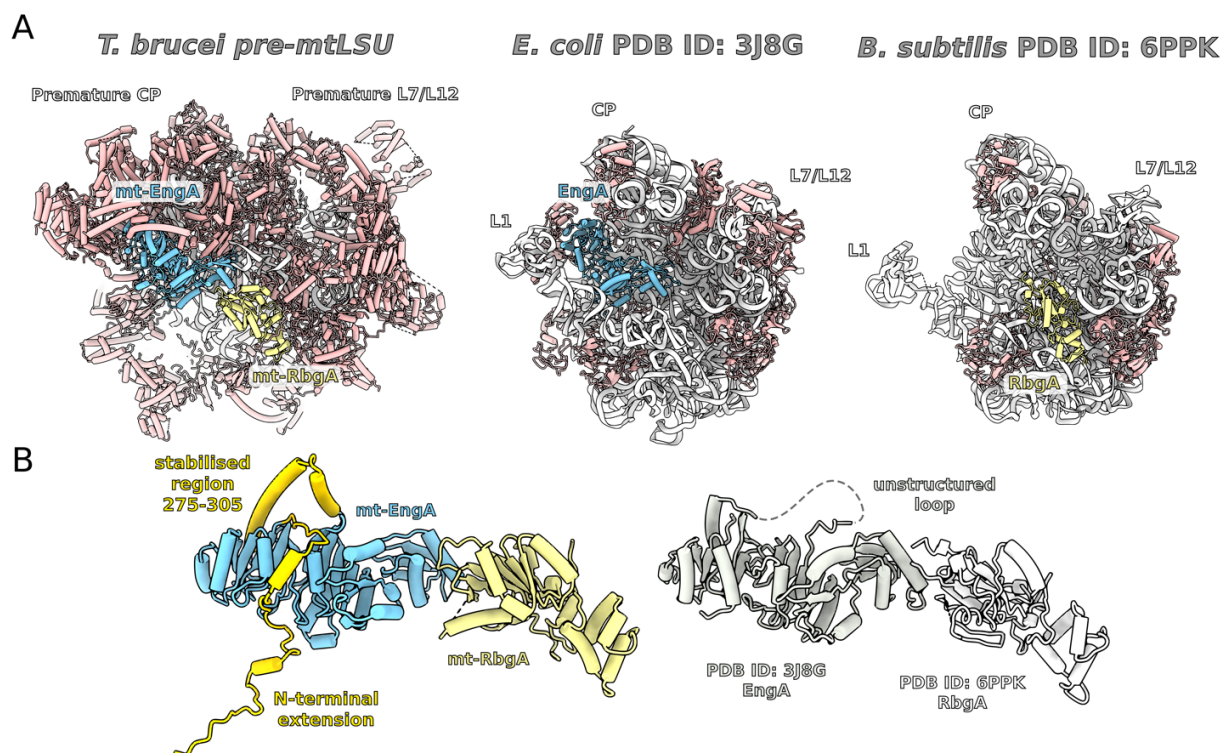

409

410 **Figure EV1.** The binding of mt-RbgA and mt-EngA at the mtLSU interface. (A) Comparison  
411 between pre-mtLSU and bacterial counterparts *E. coli* 50S:EngA (PDB ID 3J8G) and *B. subtilis*  
412 45S:RbgA (PDB ID 6PPK) shows nearly identical positions of the factors on their ribosomal  
413 complexes. (B) Comparison between mt-RbgA:mt-EngA module from the pre-mtLSU and  
414 superimposed bacterial counterparts combined from the two structures from (A) shows nearly  
415 identical conformations of the factors. The N-terminal extension of mt-EngA (orange) is buried  
416 in the mitoribosomal core and stabilizes the binding, as well as 275-305 region (orange).

417

418

419

420

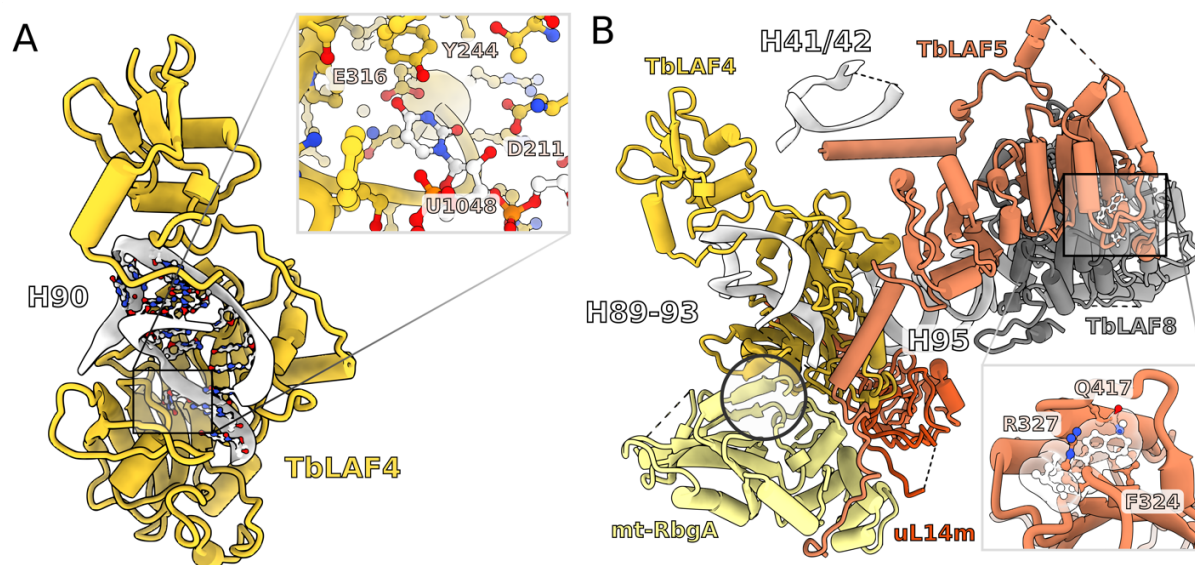

421  
422 **Figure EV2.** (A) The active site of TbLAF4 (yellow) is occupied by uridine 1048. (B) The factor  
423 TbLAF4 (yellow) binds mt-RbgA (pale-yellow) via a shared  $\beta$ -sheet (circled). The  
424 methyltransferase site of TbLAF5 does not allow for the binding of S-adenosyl methionine  
425 cofactor (white sticks and surface) due to clashes with the protein residues (red).



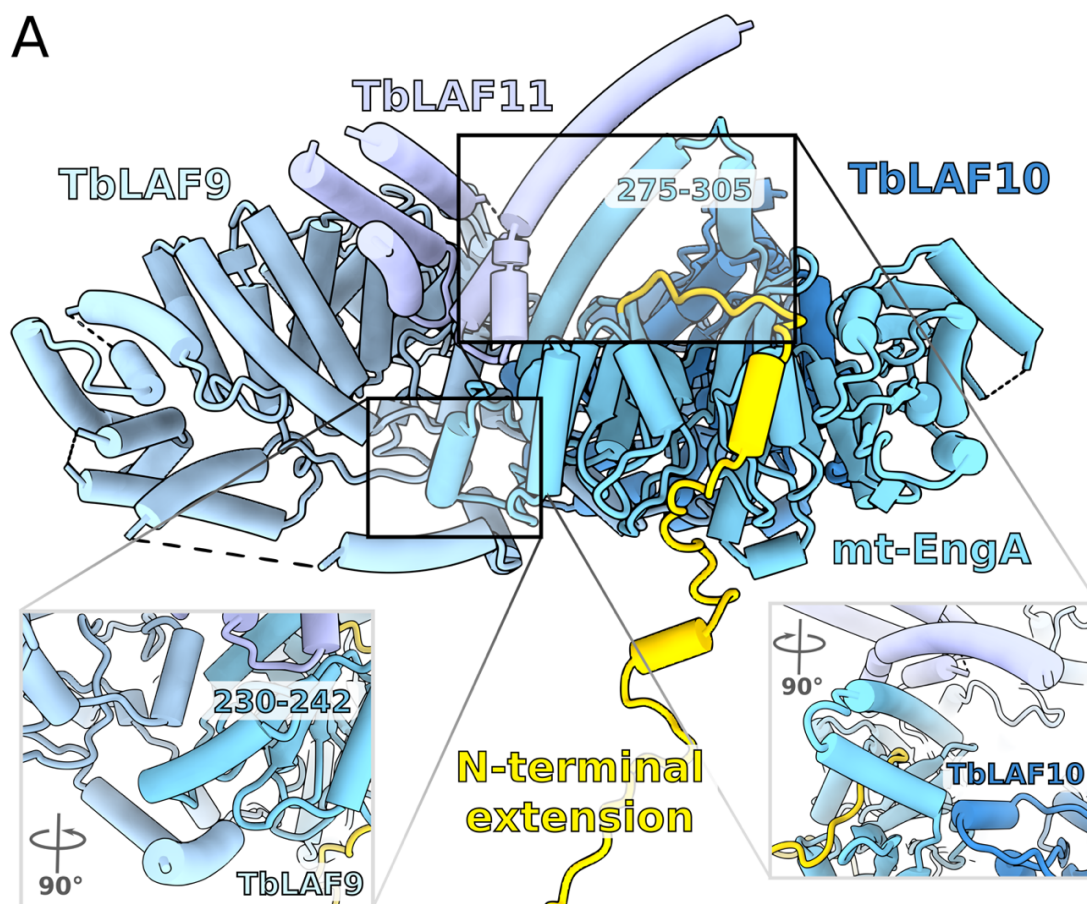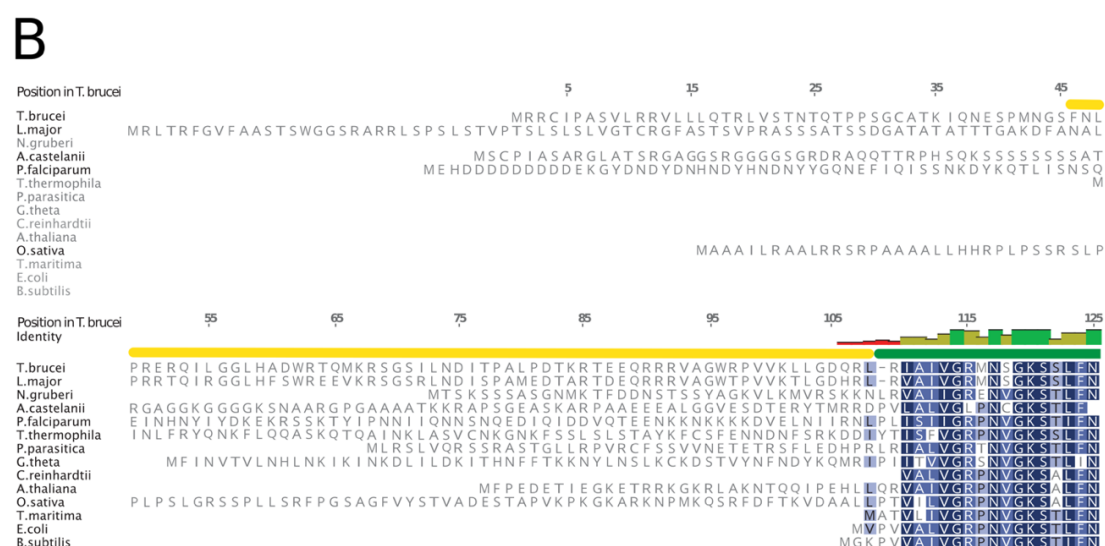

426  
 427 **Figure EV3. (A)** N-terminal extension (yellow) of mt-EngA stabilizes helix-turn-helix (275-  
 428 305), which forms interaction with TbLAF10 on the other side (bottom right panel), and a helical  
 429 bundle with TbLAF11 that is in contact with TbLAF9. **(B)** Sequence alignment of the N-  
 430 terminus of mt-EngA shows presence of the extension in different organisms.

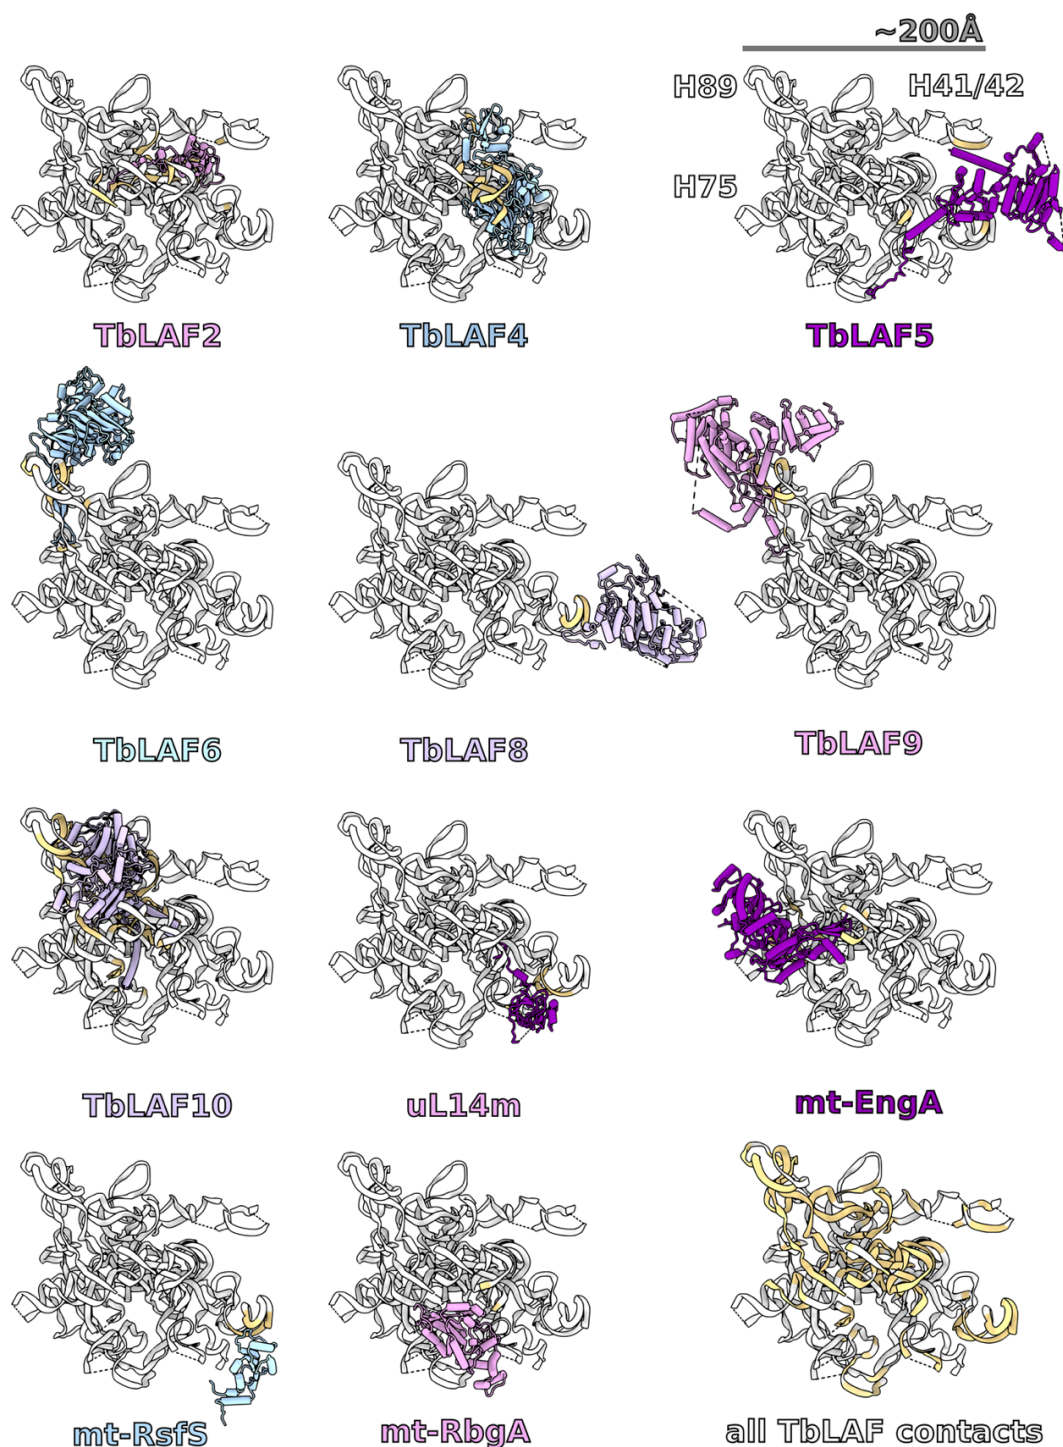

431  
432 **Figure EV4. Binding of assembly factors to rRNA.** For each panel, rRNA is shown with an  
433 individual protein characterized in the structure, which have not been reported in the mature  
434 LSU. Bottom right panel illustrates the total RNA that is involved in the interactions (yellow)  
435 with the assembly factors. Regions and nucleotides of respective rRNA domains are also  
436 presented in Supplementary File 3.

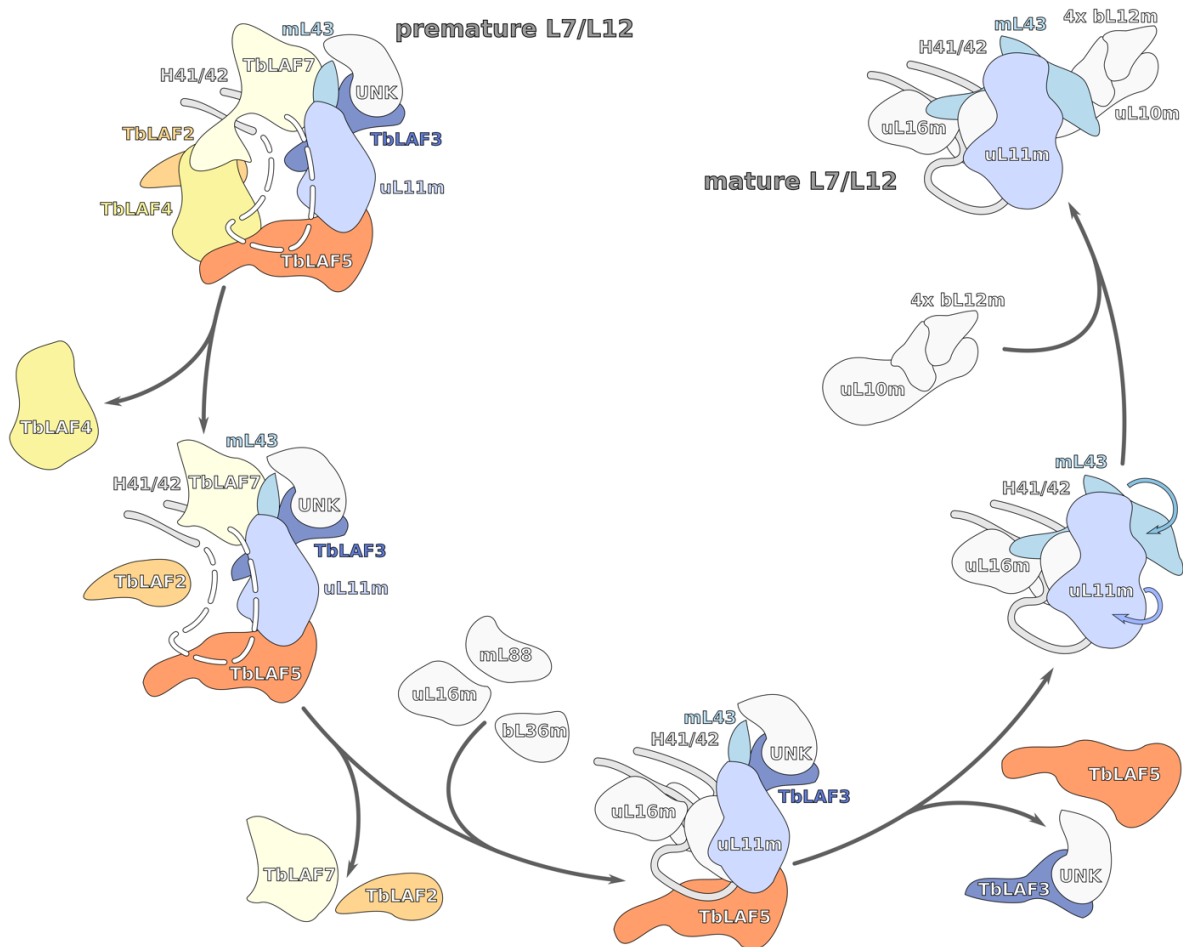

437  
438 **Figure EV5. Proposed model for the L7/L12 stalk maturation.** The series of steps starts with  
439 dismantling the assembly factors from the unfolded rRNA (white dashes) that triggers rRNA  
440 folding (white line), binding of the mitoribosomal proteins (grey) and conformational changes  
441 (arrows).  
442



## 443 **Materials and Methods**

### 444 **Strains and growth conditions**

445 *T. brucei* procyclic Lister strain 427 was grown in SDM-80 medium supplemented with 10%  
446 fetal bovine serum. Mitochondria were isolated as described earlier Schneider (2007).  $1.5 \times 10^{11}$   
447 cells were harvested, washed in 20 mM sodium phosphate buffer pH 7.9 with 150 mM NaCl and  
448 20 mM glucose, resuspended in 1 mM Tris-HCl pH 8.0, 1 mM EDTA, and disrupted by 10  
449 strokes in 40 ml Dounce homogenizer. The hypotonic lysis was stopped by immediate addition  
450 of 1/6 volume of 1.75 M sucrose. Crude mitochondria were pelleted (15 min at 16000 xg, 4°C),  
451 resuspended in 20 mM Tris-HCl pH 8.0, 250 mM sucrose, 5 mM MgCl<sub>2</sub>, 0.3 mM CaCl<sub>2</sub> and  
452 treated with 5 µg/ml DNase I for 60 min on ice. DNase I treatment was stopped by addition of  
453 one volume of the STE buffer (20 mM Tris-HCl pH 8.0, 250 mM sucrose, 2 mM EDTA)  
454 followed by centrifugation (15 min at 16000 xg, 4°C). The pellet was resuspended in 60%  
455 Percoll in STE and loaded on the bottom of six 10-35% Percoll gradient in STE in polycarbonate  
456 tubes for SW28 rotor (Beckman). Gradients were centrifuged for 1 hour at 24000 rpm, 4°C. The  
457 middle-diffused phase containing mitochondrial vesicles (15-20 ml per tube) was collected,  
458 washed twice in the STE buffer, snap-frozen in liquid nitrogen and stored at -80°C.

### 459 **Purification of mitoribosomes**

460 Mitochondria were further purified further using a stepped sucrose gradient (60 %, 32 %, 23 %, 15%)  
461 in a low ionic strength buffer (50 mM HEPES/KOH pH 7.5, 5 mM MgOAc, 2 mM  
462 EDTA). A thick pellet at the 60-32% interface was collected and lysed by mixing with 5  
463 volumes of detergent containing lysis buffer (25 mM HEPES/KOH pH 7.5, 100 mM KCl, 15  
464 mM MgOAc, 1.7 % Triton X-100, 2 mM DTT, Complete-EDTA Free Protease Inhibitor). The  
465 lysate was centrifuged at 30,000 xg twice, saving the supernatant after each spin. The  
466 supernatant was then subjected to differential PEG precipitation; PEG 10,000 was added to reach  
467 a concentration of 1.5 % (w/v) and incubated on ice for 10 mins, followed by a spin at 30,000 xg.  
468 The supernatant was transferred to a fresh tube, and PEG 10,000 was added to reach a  
469 concentration of 8 % (w/v) then incubated on ice for 10 mins, followed by a spin at 30,000 xg.  
470 The pellet was then resuspended in 800 µl of lysis buffer and then layered onto a 34% sucrose  
471 cushion (25 mM HEPES/KOH pH 7.5, 100 mM KCl, 15 mM MgOAc, 1.0 % Triton X-100, 2  
472 mM DTT, Complete-EDTA Free Protease Inhibitor) in a TLA120.2 centrifuge tube (0.4 ml of  
473 cushion per tube). Mitoribosomes were pelleted through the cushion by centrifugation at 231,550  
474 xg for 45 min. Pelleted mitoribosomes were resuspended using a total of 100 µl of resuspension  
475 buffer (25 mM HEPES/KOH pH 7.5, 100 mM KCl, 15 mM MgOAc, 0.01 % β-DDM, 2 mM  
476 DTT). The resuspended mitoribosomes were then layered onto a continuous 15-30 % sucrose  
477 gradient and centrifuged in a TLS55 rotor for 120 min at 213,626 xg. The gradient was  
478 fractionated manually, and fractions containing mitoribosome as judged by the 260 nm  
479 absorbance were pooled and buffer exchanged in a centrifugal concentrator.

### 480 **Cryo-EM and model building**

481 For cryo-EM analysis, 3  $\mu\text{L}$  of the sample at a concentration of OD260 3.5, was applied onto a  
482 glow-discharged (20 mA for 30 seconds) holey-carbon grid (Quantifoil R2/2, copper, mesh 300)  
483 coated with continuous carbon (of  $\sim 3$  nm thickness) and incubated for 30 seconds in a controlled  
484 environment of 100% humidity and 4  $^{\circ}\text{C}$  temperature. The grids were blotted for 3 seconds,  
485 followed by plunge-freezing in liquid ethane, using a Vitrobot MKIV (FEI/Thermofischer). The  
486 data was collected on a FEI Titan Krios (FEI/Thermofischer; Scilifelab, Stockholm, Sweden, and  
487 ESRF, Grenoble, France) transmission electron microscope operated at 300 keV, using C2  
488 aperture of 70  $\mu\text{m}$ ; slit width of 20 eV on a GIF quantum energy filter (Gatan). A K2 Summit  
489 detector (Gatan) was used to collect images at a pixel size of 1.05  $\text{\AA}$  (magnification of 130,000X)  
490 with a dose of  $\sim 35$  electrons/ $\text{\AA}^2$  fractionated over 20 frames. A defocus range of 0.8 to 3.5  $\mu\text{m}$   
491 was applied.

492 19,158 micrographs (after bad images were removed based on real and reciprocal space features)  
493 were collected across 5 non-consecutive data acquisition sessions and processed together using  
494 RELION. 896,263 particles were picked using Warp and coordinates were imported into  
495 RELION for particle extraction at an initial binning factor of two. The particles were subjected to  
496 supervised 3D classification using references generated previously in a screening dataset, which  
497 was started based on the *T. brucei* cytosolic ribosome as an initial model. This crude separation  
498 classified the 207,788 particles as mtLSU-like, and the remaining as mature mtLSU-like, SSU-  
499 like or monosomes. This subset was subjected to auto-refinement separately to improve the  
500 angular assignments and then classified further using fine-angular searches with a solvent mask  
501 applied. From the mtLSU-like particles, 32,339 particles were retained as pre-mtLSU of good  
502 quality and the rest were discarded as non-particles. The retained pre-mtLSUs were then  
503 subjected to auto-refinement once more to improve the angles further, this time applying a  
504 solvent mask during the refinement procedure, and then the 3D reconstructions obtained were  
505 used as a reference for CTF refinement to improve the reconstruction. The final map was then  
506 estimated for local resolution using RELION and sharpened with a B-factor appropriate for the  
507 reconstruction as estimated automatically using the postprocessing procedure.

508 Model building was done using *Coot* 0.9 (Emsley et al 2010). First the model of the mature  
509 mtLSU (PDB ID:6HIX) was fitted to the density. Chains present in the pre-mtLSU were then  
510 individually fitted and locally refined. Additional chains were first identified using information  
511 from sidechain densities. First the map density, chemical environment and sidechain interactions  
512 were used to create probable sequences. Those sequences were then queried against *T. brucei*  
513 specific databases; potential hits were evaluated individually and finally assigned. Models were  
514 modeled de-novo. All models were refined iteratively using PHENIX (Liebschner et al 2019)  
515 realspace refinement and validated using MolProbity (Williams et al 2018). The data collection,  
516 model refinement and validation statistics are presented in Supplementary data file 1. All figures  
517 were prepared either in Chimera (Pettersen et al 2004) or ChimeraX (Goddard et al 2018) with  
518 additional graphical elements created using Inkscape.

519 **Search for homologs of assembly factors and sequence alignments**

520 Homologs of assembly factors found in our pre-mtLSU and identified by cryo-EM were  
521 searched in the NCBI protein database with Position-Specific Iterated BLAST (Altschul et al  
522 1997) using sequences of individual factors from *T. brucei* as queries. The searches were  
523 targeted against selected genera. Sequence alignments were generated with the MUSCLE  
524 (Larkin et al 2007) algorithm in Geneious (Biomatters Ltd., New Zealand) and corrected  
525 manually.

526

### 527 **Data availability**

528 The electron density map has been deposited in EMDDB under accession code EMD-XXX. The  
529 model has been deposited in PDB under accession code XXXX. All data is available in the paper  
530 or Supplementary Information.

531

### 532 **Acknowledgements**

533 The authors thank the SciLifeLab cryo-EM and mass spectrometry facilities for data collection,  
534 Nikhil Jain for comments. This work was supported by the Swedish Foundation for Strategic  
535 Research (FFL15:0325), Ragnar Söderberg Foundation (M44/16), Swedish Research Council  
536 (NT\_2015-04107), Cancerfonden (2017/1041), European Research Council (ERC-2018-StG-  
537 805230), Knut and Alice Wallenberg Foundation (2018.0080), EMBO Young Investigator  
538 Program to A.A., and by and by Czech Science Foundation (18-17529S) and ERD fund  
539 (CZ.02.1.01/0.0/0.0/16\_019/0000759) to A.Z., and by Czech Science Foundation (20-04150Y)  
540 to O.G. The cryo-EM facility is funded by the Knut and Alice Wallenberg, Family Erling  
541 Persson, and Kempe foundations.

542

### 543 **Author contributions**

544 Project conceptualization: OG, AZ, AA; Sample preparation for cryo-EM: OG, SA, AA; Data  
545 acquisition and processing: SA; Model building and validation: VT, OG, SA, RB; Structural data  
546 interpretation: VT, OG, AA; Manuscript writing and figure preparation: VT, OG, SA, RB, AZ,  
547 AA.

548

### 549 **References**

550 Achila, D., Gulati, M., Jain, N. & Britton, R. A. (2012) Biochemical characterization of  
551 ribosome assembly GTPase RbgA in *Bacillus subtilis*, *J Biol Chem.* 287, 8417-23  
552 Altschul, S. F., Madden, T. L., Schäffer, A. A., Zhang, J., Zhang, Z., Miller, W., & Lipman, D. J.  
553 (1997). Gapped BLAST and PSI-BLAST: a new generation of protein database search  
554 programs. *Nucleic acids research*, 25(17), 3389-3402  
555 Amunts, A., Brown, A., Bai, X. C., Llacer, J. L., Hussain, T., Emsley, P., Long, F., Murshudov,  
556 G., Scheres, S. H. & Ramakrishnan, V. (2014) Structure of the yeast mitochondrial large  
557 ribosomal subunit, *Science.* 343, 1485-9

- 558 Amunts, A., Brown, A., Toots, J., Scheres, S. H. W. & Ramakrishnan, V. (2015) Ribosome. The  
559 structure of the human mitochondrial ribosome, *Science*. 348, 95-98
- 560 Antonicka, H. and Shoubbridge, E.A., 2015. Mitochondrial RNA granules are centers  
561 for posttranscriptional RNA processing and ribosome biogenesis. *Cell reports*, 10(6),  
562 pp.920-932
- 563 Barrientos, A., Korr, D., Barwell, K. J., Sjulsen, C., Gajewski, C. D., Manfredi, G., Ackerman, S.  
564 & Tzagoloff, A. (2003) MTG1 codes for a conserved protein required for mitochondrial  
565 translation, *Mol Biol Cell*. 14, 2292-302
- 566 Bogenhagen, D.F., Martin, D.W. and Koller, A., 2014. Initial steps in RNA  
567 processing and ribosome assembly occur at mitochondrial DNA nucleoids. *Cell*  
568 *metabolism*, 19(4), pp.618-629
- 569 Brown, A., Rathore, S., Kimanius, D., Aibara, S., Bai, X. C., Rorbach, J., Amunts, A. &  
570 Ramakrishnan, V. (2017) Structures of the human mitochondrial ribosome in native states of  
571 assembly, *Nat Struct Mol Biol*. 24, 866-9
- 572 Couvillion MT, Soto IC, Shipkovenska G, Churchman LS., 2016. Synchronized mitochondrial  
573 and cytosolic translation programs. *Nature*, 533(7604):499–503
- 574 Davis, J. H., Tan, Y. Z., Carragher, B., Potter, C. S., Lyumkis, D. & Williamson, J. R. (2016)  
575 Modular Assembly of the Bacterial Large Ribosomal Subunit, *Cell*. 167, 1610-1622 e15
- 576 Davis, J. H. & Williamson, J. R. (2017) Structure and dynamics of bacterial ribosome  
577 biogenesis, *Philos Trans R Soc Lond B Biol Sci*. 372
- 578 De Castro, E., Sigrist, C. J., Gattiker, A., Bulliard, V., Langendijk-Genevaux, P. S., Gasteiger,  
579 E., ... & Hulo, N. (2006). ScanProsite: detection of PROSITE signature matches and ProRule-  
580 associated functional and structural residues in proteins. *Nucleic acids research*, 34(suppl\_2),  
581 W362-W365
- 582 De Silva, D., Tu, Y.T., Amunts, A., Fontanesi, F. and Barrientos, A., 2015. Mitochondrial  
583 ribosome assembly in health and disease. *Cell Cycle*, 14(14), pp.2226-2250
- 584 Emsley, P., Lohkamp, B., Scott, W. G. & Cowtan, K. (2010) Features and development of Coot.  
585 *Acta Crystallogr. D Biol. Crystallogr*. 66, 486–501
- 586 Fiedorczuk, K., Letts, J. A., Degliesposti, G., Kaszuba, K., Skehel, M., & Sazanov, L. A. (2016).  
587 Atomic structure of the entire mammalian mitochondrial complex I. *Nature*, 538(7625), 406-410
- 588 Greber, B. J., Boehringer, D., Leibundgut, M., Bieri, P., Leitner, A., Schmitz, N., Aebersold, R.  
589 & Ban, N. (2014) The complete structure of the large subunit of the mammalian mitochondrial  
590 ribosome, *Nature*. 515, 283-6
- 591 Greber, B. J., Bieri, P., Leibundgut, M., Leitner, A., Aebersold, R., Boehringer, D. & Ban, N.  
592 (2015) Ribosome. The complete structure of the 55S mammalian mitochondrial ribosome,  
593 *Science*. 348, 303-8
- 594 Greber, B. J. & Ban, N. (2016) Structure and Function of the Mitochondrial Ribosome, *Annu Rev*  
595 *Biochem*. 85, 103-32.
- 596 Goddard, T.D., Huang, C.C., Meng, E.C., Pettersen, E.F., Couch, G.S., Morris, J.H. and Ferrin,  
597 T.E. (2018) UCSF ChimeraX: Meeting modern challenges in visualization and analysis. *Protein*  
598 *Science* 27, 14–25.

- 599 Gutgsell, N. S., Deutscher, M. P. & Ofengand, J. (2005) The pseudouridine synthase RluD is  
600 required for normal ribosome assembly and function in *Escherichia coli*, *RNA*. 11, 1141-52.
- 601 Gutgsell, N. S., Del Campo, M., Raychaudhuri, S. & Ofengand, J. (2001) A second function for  
602 pseudouridine synthases: A point mutant of RluD unable to form pseudouridines 1911, 1915, and  
603 1917 in *Escherichia coli* 23S ribosomal RNA restores normal growth to an RluD-minus strain,  
604 *RNA*. 7, 990-8.
- 605 Jomaa, A., Jain, N., Davis, J. H., Williamson, J. R., Britton, R. A. & Ortega, J. (2014) Functional  
606 domains of the 50S subunit mature late in the assembly process, *Nucleic Acids Res.* 42, 3419-35
- 607 Kimanius, D., Forsberg, B. O., Scheres, S. H. & Lindahl, E. (2016) Accelerated cryo-EM  
608 structure determination with parallelisation using GPUs in RELION-2, *Elife*. 5
- 609 Itoh, Y., Naschberger, A., Mortezaei, N., Herrmann, J. & Amunts, A. (2020) Analysis of  
610 translating mitoribosome reveals functional characteristics of protein synthesis in mitochondria  
611 of fungi, *bioRxiv* 2020.01.31.929331
- 612 Larkin, M. A., Blackshields, G., Brown, N. P., Chenna, R., McGettigan, P. A., McWilliam, H., ...  
613 & Thompson, J. D. (2007). Clustal W and Clustal X version 2.0. *bioinformatics*, 23(21), 2947-  
614 2948
- 615 Li, N., Chen, Y., Guo, Q., Zhang, Y., Yuan, Y., Ma, C., Deng, H., Lei, J. & Gao, N. (2013)  
616 Cryo-EM structures of the late-stage assembly intermediates of the bacterial 50S ribosomal  
617 subunit, *Nucleic Acids Res.* 41, 7073-83
- 618 Liebschner, D., Afonine, P.V., Baker, M.L., Bunkóczi, G., Chen, V.B., Croll, T.I., Hintze, B.,  
619 Hung, L.W., Jain, S., McCoy, A.J. and Moriarty, N.W. (2019) Macromolecular structure  
620 determination using X-rays, neutrons and electrons: recent developments in Phenix. *Acta*  
621 *Crystallogr D Struct Biol* 75, 861–877
- 622 Masud, A.J., Kastaniotis, A.J., Rahman, M.T., Autio, K.J. and Hiltunen, J.K. (2019).  
623 Mitochondrial acyl carrier protein (ACP) at the interface of metabolic state sensing and  
624 mitochondrial function. *Biochimica et Biophysica Acta (BBA)-Molecular Cell Research*, 1866,  
625 118540
- 626 Ni, X., Davis, J. H., Jain, N., Razi, A., Benlekbir, S., McArthur, A. G., Rubinstein, J. L., Britton,  
627 R. A., Williamson, J. R. & Ortega, J. (2016) YphC and YsxC GTPases assist the maturation of  
628 the central protuberance, GTPase associated region and functional core of the 50S ribosomal  
629 subunit, *Nucleic Acids Res.* 44, 8442-55
- 630 Nikolay, R., Hilal, T., Qin, B., Mielke, T., Burger, J., Loerke, J., Textoris-Taube, K., Nierhaus,  
631 K. H. & Spahn, C. M. T. (2018) Structural Visualization of the Formation and Activation of the  
632 50S Ribosomal Subunit during In Vitro Reconstitution, *Mol Cell*. 70, 881-893 e3
- 633 Ott, M., Amunts, A., & Brown, A., 2016. Organization and regulation of mitochondrial protein  
634 synthesis. *Annual Review of Biochemistry*, 85, 77-101.
- 635 Pausch, P., Steinchen, W., Wieland, M., Klaus, T., Freibert, S. A., Altegoer, F., Wilson, D. N. &  
636 Bange, G. (2018) Structural basis for (p)ppGpp-mediated inhibition of the GTPase RbgA, *J Biol*  
637 *Chem.* 293, 19699-19709
- 638 Pearce, S. F., Rebelo-Guiomar, P., D'Souza, A. R., Powell, C. A., Van Haute, L., & Minczuk, M.  
639 (2017). Regulation of mammalian mitochondrial gene expression: recent advances. *Trends in*  
640 *biochemical sciences*, 42(8), 625-639.



- 641 Pettersen, E.F., Goddard, T.D., Huang, C.C., Couch, G.S., Greenblatt, D.M., Meng, E.C. and  
642 Ferrin, T.E. (2004) UCSF Chimera – a visualization system for exploratory research and  
643 analysis. *Journal of Computational Chemistry* 25, 1605–1612
- 644 Petrov, A. S., Wood, E. C., Bernier, C. R., Norris, A. M., Brown, A. & Amunts, A. (2019)  
645 Structural Patching Fosters Divergence of Mitochondrial Ribosomes, *Mol Biol Evol.* 36, 207-219
- 646 Ramrath, D. J. F., Niemann, M., Leibundgut, M., Bieri, P., Prange, C., Horn, E. K., Leitner, A.,  
647 Boehringer, D., Schneider, A. & Ban, N. (2018) Evolutionary shift toward protein-based  
648 architecture in trypanosomal mitochondrial ribosomes, *Science.* 362
- 649 Saurer, M., Ramrath, D. J. F., Niemann, M., Calderaro, S., Prange, C., Mattei, S., Scaiola, A.,  
650 Leitner, A., Bieri, P., Horn, E. K., Leibundgut, M., Boehringer, D., Schneider, A. & Ban, N.  
651 (2019) Mitoribosomal small subunit biogenesis in trypanosomes involves an extensive assembly  
652 machinery, *Science.* 365, 1144-1149.
- 653 Seffouh, A., Jain, N., Jahagirdar, D., Basu, K., Razi, A., Ni, X., Guarne, A., Britton, R. A. &  
654 Ortega, J. (2019) Structural consequences of the interaction of RbgA with a 50S ribosomal  
655 subunit assembly intermediate, *Nucleic Acids Res.* 47, 10414-10425
- 656 Schneider, A., Charriere, F., Pusnik, M. & Horn, E. K. (2007) Isolation of mitochondria from  
657 procyclic *Trypanosoma brucei*, *Methods Mol Biol.* 372, 67-80
- 658 Tegunov, D. & Cramer, P. (2019) Real-time cryo-electron microscopy data preprocessing with  
659 Warp, *Nat Methods.* 16, 1146-1152
- 660 Tobiasson, V. & Amunts, A. (2020) Ciliate mitoribosome illuminates evolutionary steps of  
661 mitochondrial translation, *Elife.* 9, e59264
- 662 Van Vranken, J.G., Jeong, M.Y., Wei, P., Chen, Y.C., Gygi, S.P., Winge, D.R. and Rutter, J.  
663 (2016). The mitochondrial acyl carrier protein (ACP) coordinates mitochondrial fatty acid  
664 synthesis with iron sulfur cluster biogenesis. *Elife*, 5, e17828.
- 665 32
- 666 Waltz, F., Soufari, H., Bochler, A., Giege, P. & Hashem, Y. (2020) Cryo-EM structure of the  
667 RNA-rich plant mitochondrial ribosome, *Nat Plants.* 6, 377-383
- 668 Williams, JS. et al. (2018) MolProbity: More and better reference data for improved all-atom  
669 structure validation. *Protein Science* 27, 293-315
- 670 Zikova, A., Panigrahi, A. K., Dalley, R. A., Acestor, N., Anupama, A., Ogata, Y., Myler, P. J. &  
671 Stuart, K. (2008) *Trypanosoma brucei* mitochondrial ribosomes: affinity purification and  
672 component identification by mass spectrometry, *Mol Cell Proteomics.* 7, 1286-96.
- 673 Zhang, X., Yan, K., Zhang, Y., Li, N., Ma, C., Li, Z., Zhang, Y., Feng, B., Liu, J., Sun, Y., Xu,  
674 Y., Lei, J. & Gao, N. (2014) Structural insights into the function of a unique tandem GTPase  
675 EngA in bacterial ribosome assembly, *Nucleic Acids Res.* 42, 13430-9
- 676 Zivanov, J., Nakane, T., Forsberg, B. O., Kimanius, D., Hagen, W. J., Lindahl, E., Scheres, S. H.  
677 (2018) New tools for automated high-resolution cryo-EM structure determination in RELION-  
678 3, *Elife* 7
- 679 Zhu, J., King, M.S., Yu, M., Klipcan, L., Leslie, A.G. and Hirst, J. (2015) Structure of  
680 subcomplex I $\beta$  of mammalian respiratory complex I leads to new supernumerary subunit  
681 assignments. *Proceedings of the National Academy of Sciences*, 112, 12087-12092



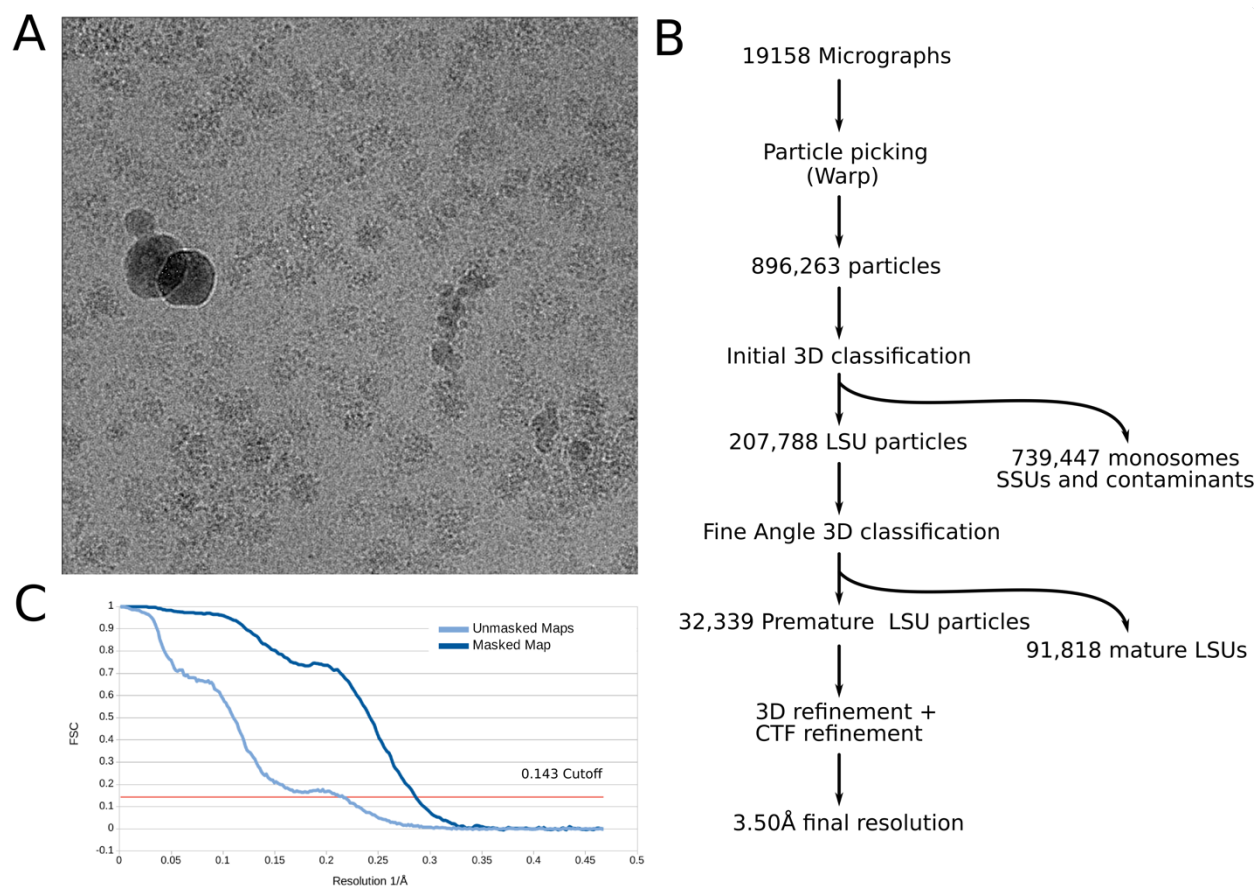

**Appendix Figure S1.** Cryo-EM data processing. **(A)** Representative micrograph. **(B)** Processing workflow. **(C)** Fourier shell correlation (FSC) curves. Resolution is estimated based on the 0.143 FSC cut-off criterion (red line).

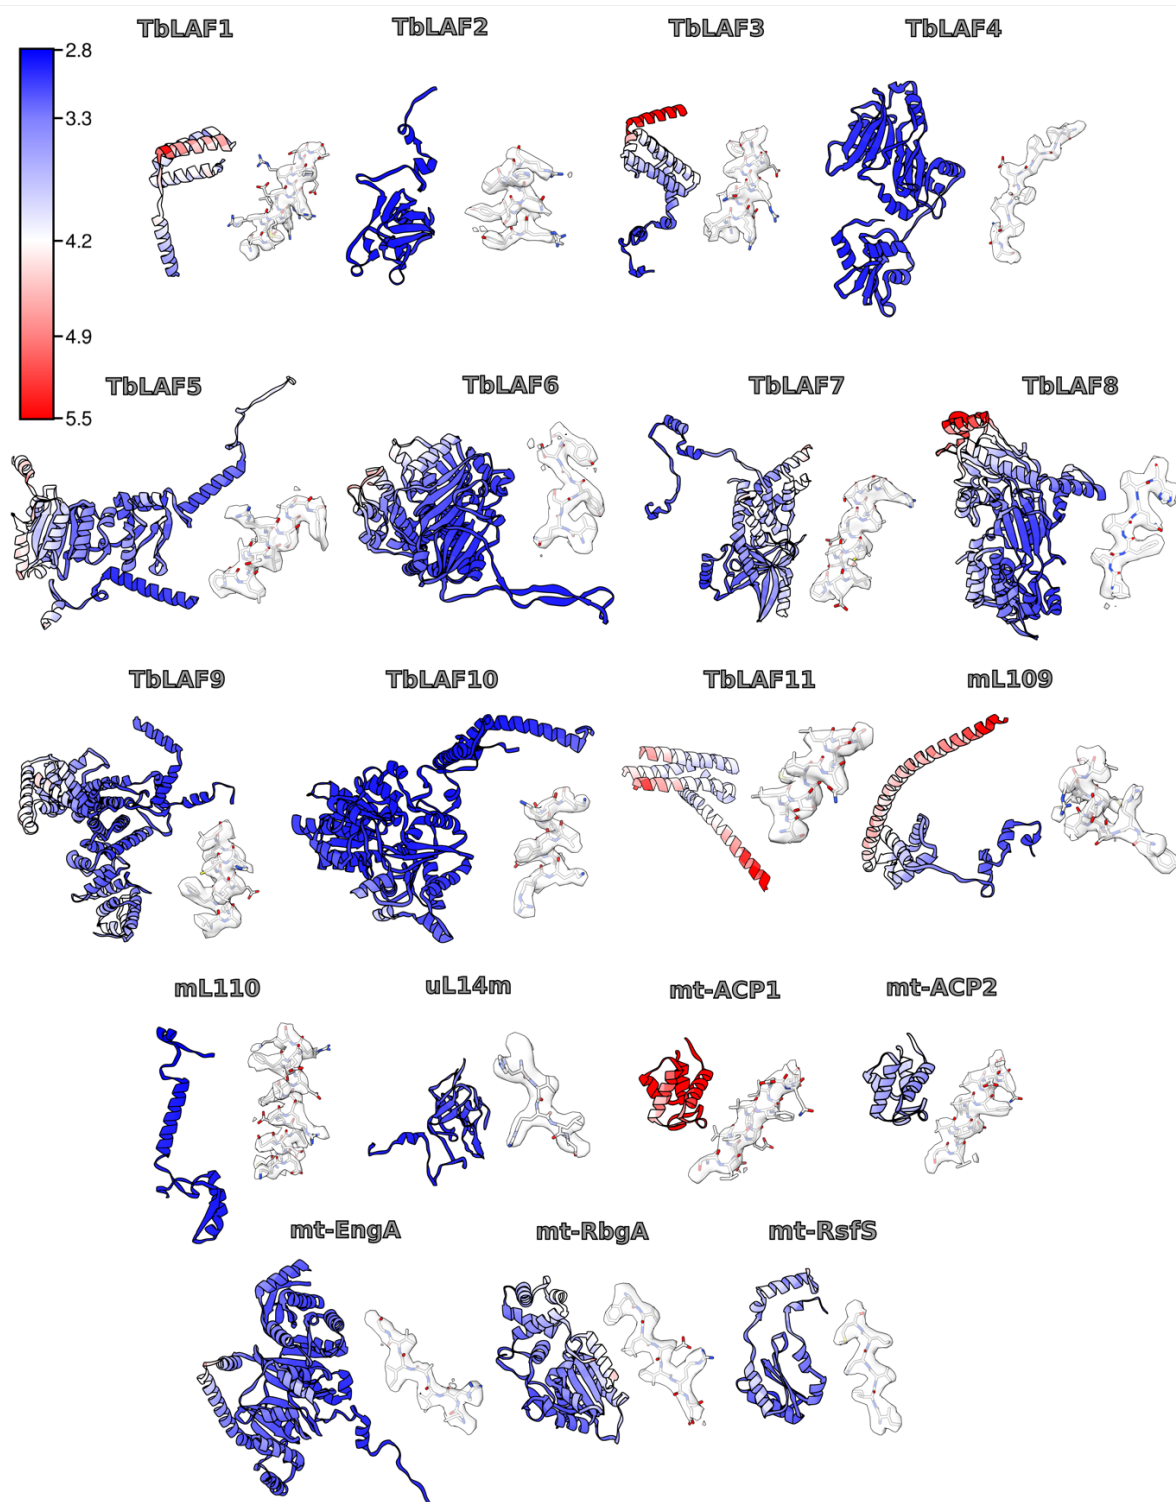

**Appendix Figure S2.** Examples of densities and models for individual assembly factors and newly identified proteins colored by local resolution of the density in the corresponding regions.

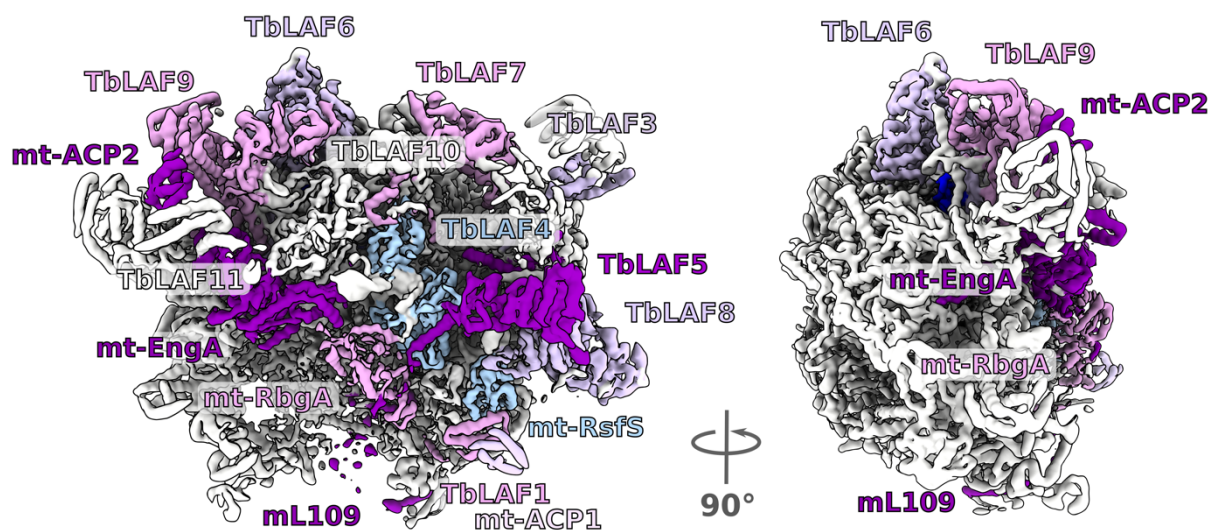

**Appendix Figure S3.** Cryo-EM density map of the pre-mtLSU showing distribution of the assembly factors.

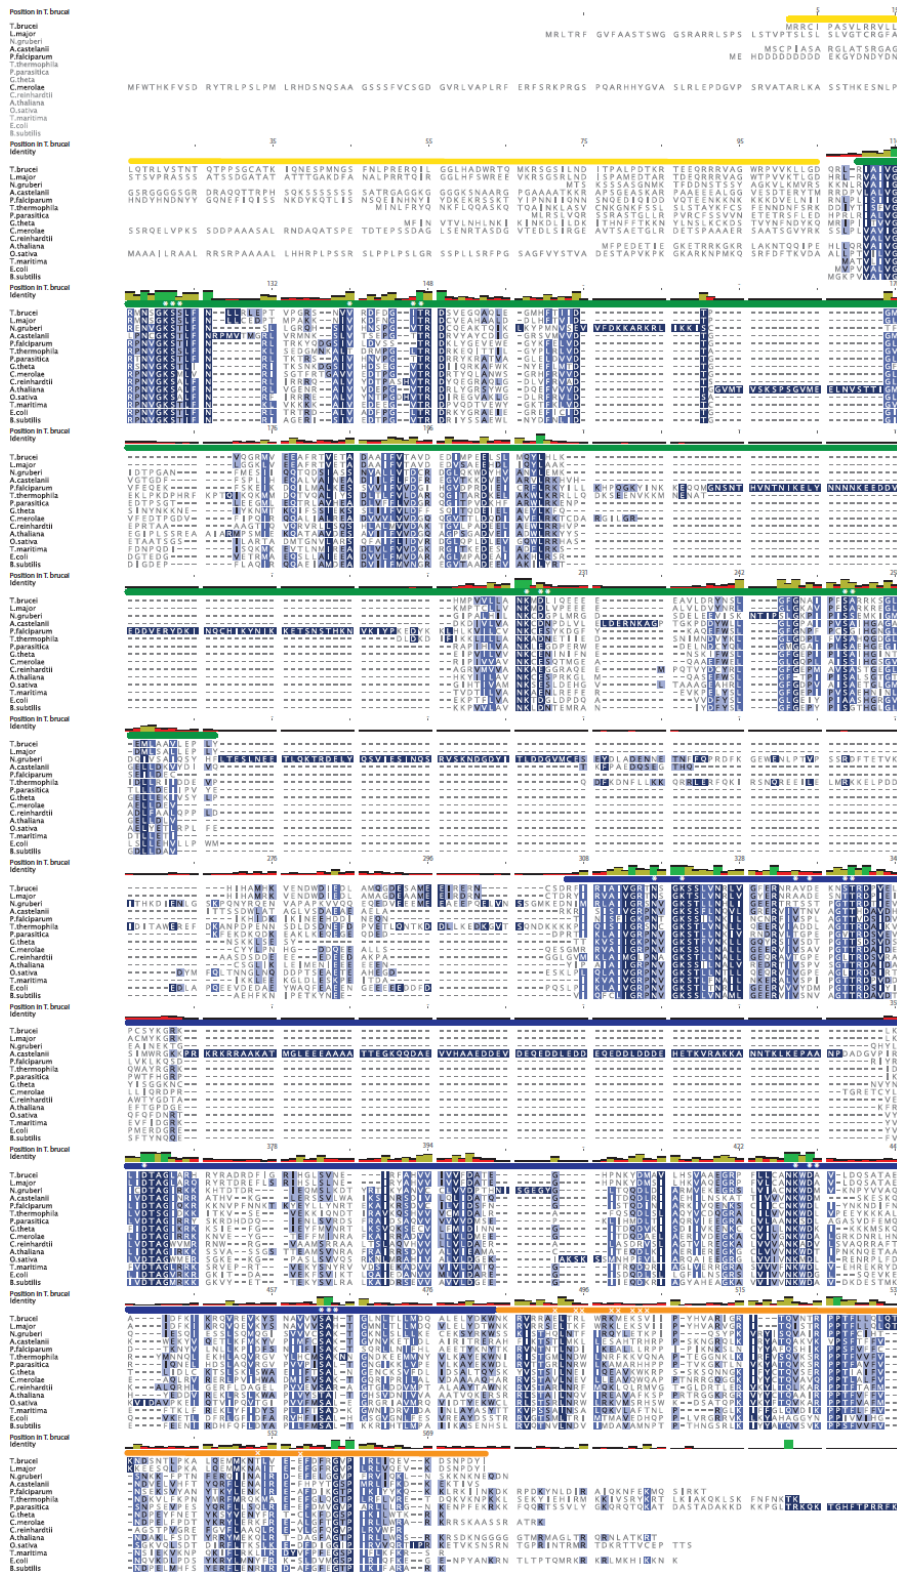

**Appendix Figure S4.** Sequence alignment of EngA homologs from representative bacterial and eukaryotic species. The yellow, green, blue and orange horizontal bars mark the N-terminal extension, GTPase domain (GD) 1, GD2, and the KH domain, respectively. The white asterisks and crosses mark side chains in *T. brucei* mt-RbgA that coordinate GTP and interact with mt-RbgA, respectively. The green, yellow, and red vertical bars above the alignment correspond to 100%, <100% and  $\geq 30\%$ , and <30% identities at the respective position.



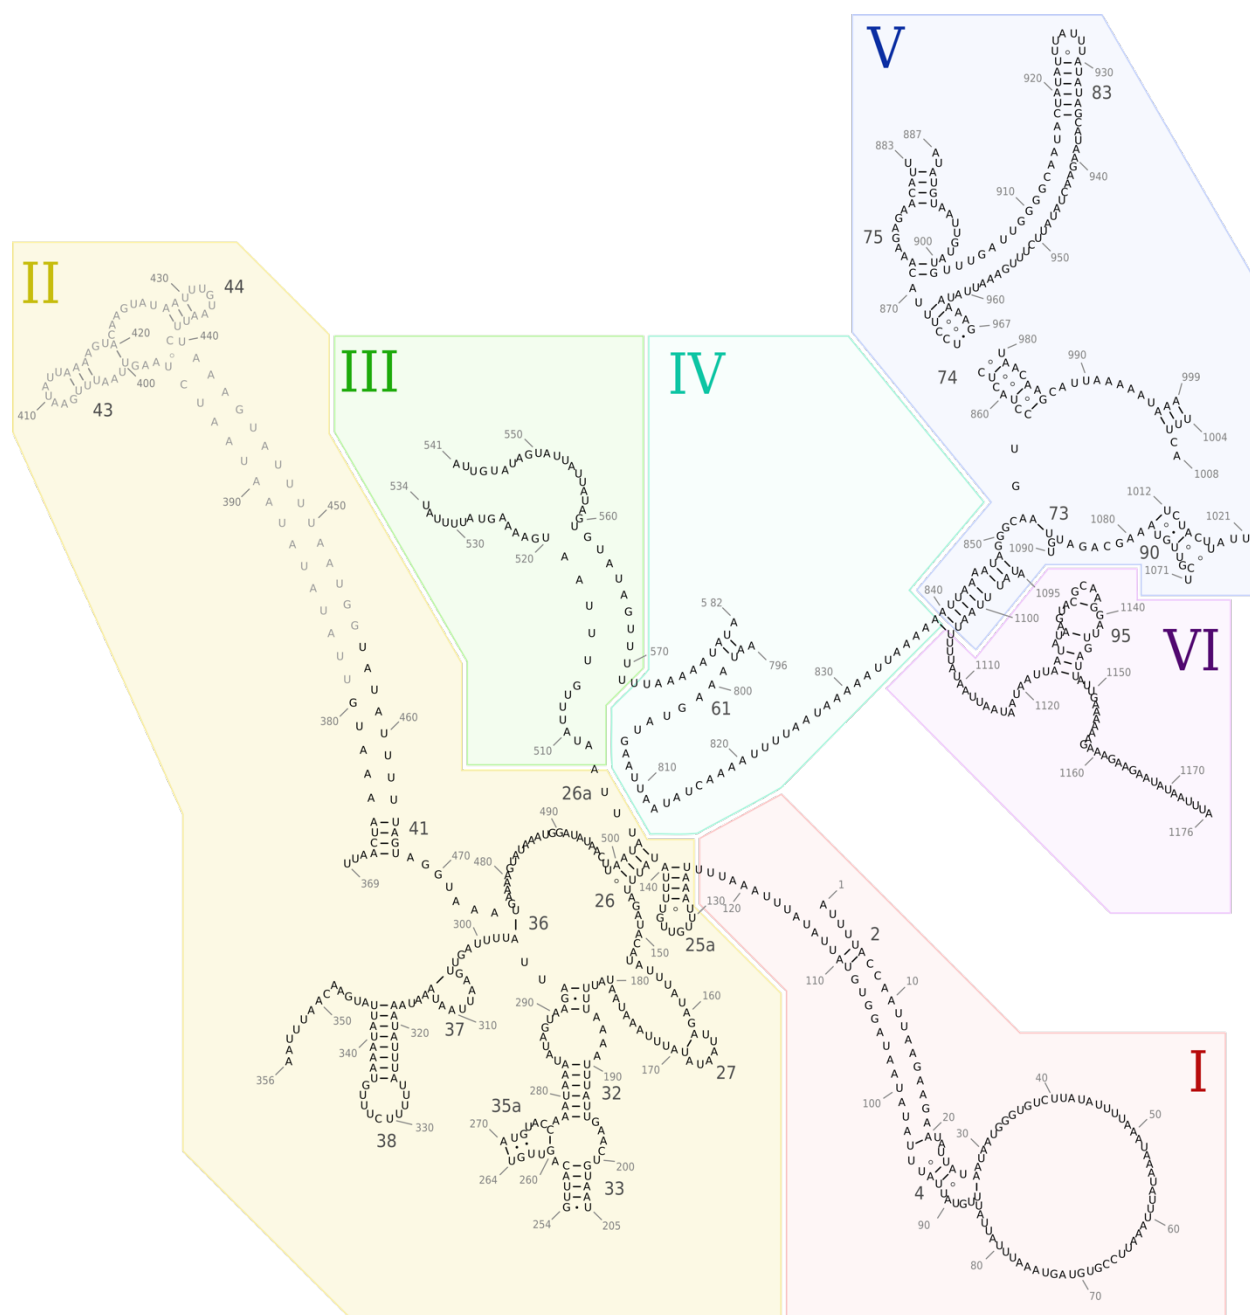

**Appendix Figure S5.** Secondary structure rRNA diagram derived from the model and colored by domain. Unmodeled sections that appear in the mature mtLSU are shown in gray. Domains in Roman numerals.

### Supplementary File 1. Cryo-EM data collection, refinement and validation statistics

| Consensus map                         |         |
|---------------------------------------|---------|
| <b>Data collection and processing</b> |         |
| Magnification                         | 130000x |
| Voltage (kV)                          | 300     |

|                                                  |             |
|--------------------------------------------------|-------------|
| Electron exposure (e-/Å <sup>2</sup> )           | 35          |
| Defocus range (µm)                               | -0.8 ~ -3.5 |
| Pixel size (Å)                                   | 1.05        |
| Symmetry imposed                                 | C1          |
| Initial particle images (no.)                    | 896,263     |
| Final particle images (no.)                      | 32,339      |
| Map resolution (Å)                               | 3.50        |
| FSC threshold 0.143                              |             |
| Map resolution range (Å)                         | 3.0~10      |
| <b>Refinement</b>                                |             |
| Map sharpening <i>B</i> factor (Å <sup>2</sup> ) | -70         |
| Model composition                                |             |
| Non-hydrogen atoms                               | 146831      |
| Protein residues                                 | 17415       |
| Ligands                                          | 10          |
| <i>B</i> factors min/max/avg (Å <sup>2</sup> )   |             |
| Protein                                          | 17/172/68   |
| Nucleotide                                       | 22/281/57   |
| Ligand                                           | 35/194/61   |
| R.m.s. deviations                                |             |
| Bond lengths (Å)                                 | 0.002       |
| Bond angles (°)                                  | 0.46        |
| Validation                                       |             |
| MolProbity score                                 | 1.65        |
| Clashscore                                       | 6.7         |
| Poor rotamers (%)                                | 0.35        |
| Ramachandran plot                                |             |
| Favored (%)                                      | 95.6        |
| Allowed (%)                                      | 4.10        |
| Disallowed (%)                                   | 0.03        |

## Supplementary File 2. Summary of pre-mtLSU components

| Alias           | Chain ID | TriTrypDB Gene ID (Lister strain 427) | TriTrypDB Gene ID (reference strain TREU927) | Uniprot ID (reference strain TREU927) | Full size | Modeled residues                                                                                                                                     | Comment                |
|-----------------|----------|---------------------------------------|----------------------------------------------|---------------------------------------|-----------|------------------------------------------------------------------------------------------------------------------------------------------------------|------------------------|
| <b>12S rRNA</b> | AA       | rRNA                                  | rRNA                                         | N/A                                   | 1176      | 1-205, 254-264, 270-356, 369-380, 404-413, 445-450, 456-534, 541-582, 591-594, 796-883, 887-967, 980-999, 1004-1008, 1012-1021, 1071-1090, 1095-1176 |                        |
| <b>uL3m</b>     | AE       | Tb427.03.5610                         | Tb927.3.5610                                 | Q580R4                                | 473       | 38-265, 272-404                                                                                                                                      |                        |
| <b>uL4m</b>     | AF       | Tb427tmp.02.3810                      | Tb927.11.6000                                | Q385G8                                | 351       | 18-459                                                                                                                                               |                        |
| <b>bL9m</b>     | AI       | Tb427.05.3410                         | Tb927.5.3410                                 | Q57UC5                                | 263       | 9-220                                                                                                                                                |                        |
| <b>uL11m</b>    | AK       | Tb427.02.4740                         | Tb927.2.4740                                 | N/A                                   | 342       | 26-200, 207-235, 239-306                                                                                                                             | 239-306 built as UNK   |
| <b>uL13m</b>    | AN       | Tb427.04.1070                         | Tb927.4.1070                                 | Q580D5                                | 202       | 10-180                                                                                                                                               |                        |
| <b>uL14m</b>    | XG       | Tb427.04.930                          | Tb927.4.930                                  | Q580C1                                | 217       | 20-107, 114-189                                                                                                                                      |                        |
| <b>uL15m</b>    | AP       | Tb427.05.3980                         | Tb927.5.3980                                 | Q57U68                                | 374       | 10-136, 150-322, 354-363                                                                                                                             |                        |
| <b>bL17m</b>    | AR       | Tb427.08.5860                         | Tb927.8.5860                                 | Q57YI7                                | 301       | 11-266                                                                                                                                               |                        |
| <b>bL19m</b>    | AT       | Tb427.01.1210                         | Tb927.1.1210                                 | Q4GZ98                                | 144       | 2-139                                                                                                                                                |                        |
| <b>bL20m</b>    | AU       | Tb427tmp.01.1930                      | Tb927.11.10170                               | Q383R2                                | 213       | 10-140, 162-205                                                                                                                                      |                        |
| <b>bL21m</b>    | AV       | Tb427.07.4140                         | Tb927.7.4140                                 | Q57UP4                                | 188       | 6-185                                                                                                                                                |                        |
| <b>uL22m</b>    | AW       | Tb427.07.2760                         | Tb927.7.2760                                 | Q57Y86                                | 278       | 2-278                                                                                                                                                |                        |
| <b>uL23m</b>    | AX       | Tb427tmp.03.0260                      | Tb927.11.870                                 | Q387G3                                | 246       | 64-228                                                                                                                                               |                        |
| <b>uL24m</b>    | AY       | Tb427.03.1710                         | Tb927.3.1710                                 | Q57ZE0                                | 378       | 1-311, 318-340                                                                                                                                       |                        |
| <b>bL28m</b>    | A1       | Tb427.06.4040                         | Tb927.6.4040                                 | Q586A2                                | 241       | 10-226                                                                                                                                               |                        |
| <b>uL29m</b>    | A2       | Tb427tmp.160.5240                     | Tb927.9.7170                                 | Q38EM7                                | 471       | 9-233, 248-471                                                                                                                                       |                        |
| <b>uL30m</b>    | A3       | Tb427tmp.211.0230                     | Tb927.9.8290                                 | Q38ED8                                | 218       | 51-200                                                                                                                                               |                        |
| <b>bL32m</b>    | A5       | Tb427.04.2330                         | Tb927.4.2330                                 | Q584F4                                | 80        | 26-80                                                                                                                                                | 2Fe-2S cluster binding |
| <b>bL35m</b>    | A8       | Tb427.10.1870                         | Tb927.10.1870                                | Q38C55                                | 181       | 40-181                                                                                                                                               |                        |
| <b>mL41</b>     | Ae       | Tb427tmp.01.1600                      | Tb927.11.9830                                | Q383U6                                | 197       | 47-161                                                                                                                                               |                        |

|             |    |                   |                |        |     |                                   |                               |
|-------------|----|-------------------|----------------|--------|-----|-----------------------------------|-------------------------------|
| <b>mL42</b> | Af | Tb427tmp.01.1840  | Tb927.11.10080 | Q383S1 | 189 | 41-173                            |                               |
| <b>mL43</b> | Ag | Tb427.04.4600     | Tb927.4.4600   | Q583E5 | 260 | 2-186                             |                               |
| <b>mL49</b> | Al | Tb427.05.3110     | Tb927.5.3110   | Q57Z82 | 218 | 37-101, 114-218                   |                               |
| <b>mL52</b> | Ao | Tb427tmp.02.2250  | Tb927.11.4650  | Q385V2 | 152 | 19-151                            |                               |
| <b>mL53</b> | Ap | Tb427.07.2990     | Tb927.7.2990   | N/A    | 309 | 16-303                            |                               |
| <b>mL63</b> | At | Tb427.07.7010     | Tb927.7.7010   | Q57XS1 | 154 | 10-154                            |                               |
| <b>mL64</b> | Av | Tb427tmp.01.3500  | Tb927.11.11630 | Q383B7 | 242 | 27-222                            | NAD binding                   |
| <b>mL67</b> | BA | Tb427tmp.55.0016  | Tb927.11.1630  | Q386Z1 | 831 | 27-83, 130-328, 335-542, 562-824  |                               |
| <b>mL68</b> | BB | Tb427.10.600      | Tb927.10.600   | Q38CI0 | 541 | 62-258, 264-294, 304-341, 346-450 | 264-294, 304-341 built as UNK |
| <b>mL70</b> | BD | Tb427.06.4200     | Tb927.6.4200   | Q586Y7 | 547 | 105-521                           |                               |
| <b>mL71</b> | BE | Tb427.07.3460     | Tb927.7.3460   | Q57WG1 | 449 | 11-190, 228-448                   |                               |
| <b>mL72</b> | BF | Tb427.06.3930     | Tb927.6.3930   | Q585Z1 | 426 | 26-62, 118-421                    |                               |
| <b>mL74</b> | BH | Tb427.10.7380     | Tb927.10.7380  | Q38AM5 | 349 | 89-314                            |                               |
| <b>mL75</b> | BI | Tb427.10.380      | Tb927.10.380   | Q38CK0 | 342 | 20-342                            |                               |
| <b>mL76</b> | BJ | Tb427tmp.01.2340  | Tb927.11.10570 | Q383M2 | 333 | 173-333                           |                               |
| <b>mL77</b> | BK | Tb427.06.2480     | Tb927.6.2480   | Q584Q8 | 386 | 84-156, 188-233, 254-269, 280-386 | 254-259 built as UNK          |
| <b>mL78</b> | BL | Tb427.10.11050    | Tb927.10.11050 | Q389N4 | 312 | 31-130, 141-197, 216-265, 281-306 |                               |
| <b>mL80</b> | BN | Tb427.06.1440     | Tb927.6.1440   | Q585A3 | 302 | 53-266                            |                               |
| <b>mL81</b> | BO | Tb427tmp.02.3230  | Tb927.11.5530  | Q385L5 | 262 | 36-193, 210-262                   |                               |
| <b>mL83</b> | BQ | Tb427.07.3430     | Tb927.7.3430   | Q57WF8 | 231 | 16-200                            |                               |
| <b>mL84</b> | BR | Tb427.06.4080     | Tb927.6.4080   | Q586A6 | 205 | 11-205                            |                               |
| <b>mL85</b> | BS | Tb427tmp.160.2250 | Tb927.9.3640   | Q38FG8 | 198 | 20-163                            |                               |
| <b>mL86</b> | BT | Tb427.05.4120     | Tb927.5.4120   | Q57Z37 | 191 | 10-176                            |                               |



|                |    |                   |                |        |     |                           |               |
|----------------|----|-------------------|----------------|--------|-----|---------------------------|---------------|
| <b>mL87</b>    | BU | Tb427tmp.01.0500  | Tb927.11.8040  | Q384L5 | 185 | 104-185                   |               |
| <b>mL89</b>    | BW | Tb427.03.820      | Tb927.3.820    | Q57WW5 | 188 | 2-188                     |               |
| <b>mL90</b>    | BX | Tb427.06.1700     | Tb927.6.1700   | Q585P1 | 190 | 61-100, 108-174           | 2x Zn binding |
| <b>mL92</b>    | BZ | Tb427tmp.01.1215  | Tb927.11.9450  | Q383Y4 | 190 | 2-190                     |               |
| <b>mL93</b>    | Ba | Tb427.10.11350    | Tb927.10.11350 | Q389K5 | 153 | 19-153                    |               |
| <b>mL94</b>    | Bb | Tb427tmp.160.5050 | Tb927.9.6910   | Q38EP7 | 162 | 38-140                    |               |
| <b>mL95</b>    | Bc | Tb427.10.11370    | Tb927.10.11370 | Q389K3 | 146 | 10-146                    |               |
| <b>mL98</b>    | Bf | Tb427.10.13770    | Tb927.10.13770 | Q388M2 | 113 | 27-68, 75-112             |               |
| <b>mL99</b>    | Bg | Tb427.02.2590     | Tb927.2.2590   | Q587H8 | 105 | 24-105                    |               |
| <b>mL100</b>   | Bh | N/A               | Tb927.9.8905   | N/A    | 92  | 2-91                      | Zn binding    |
| <b>mL109</b>   | XR | Tb427.01.1390     | Tb927.1.1390   | Q4GZ80 | 245 | 22-203                    |               |
| <b>mL110</b>   | XS | Tb427tmp.01.1810  | Tb927.11.10050 | Q383S4 | 102 | 6-102                     |               |
| <b>mt-ACP1</b> | XD | Tb427.03.860      | Tb927.3.860    | Q57WW9 | 148 | 64-146                    |               |
| <b>mt-ACP2</b> | XE | Tb427.03.860      | Tb927.3.860    | Q57WW9 | 148 | 64-146                    |               |
| <b>mt-EngA</b> | XL | Tb427.07.1640     | Tb927.7.1640   | Q57TZ4 | 576 | 45-504, 514-574           | 2xGTP binding |
| <b>mt-RbgA</b> | XQ | Tb427tmp.211.0810 | Tb927.9.9150   | Q38E75 | 451 | 44-202,215-338            |               |
| <b>mt-RsfS</b> | XJ | Tb427.06.3420     | Tb927.6.3420   | Q584Y2 | 349 | 163-312                   |               |
| <b>TbLAF1</b>  | XM | Tb427.07.4210     | Tb927.7.4210   | Q57UQ1 | 116 | 25-115                    |               |
| <b>TbLAF2</b>  | XA | Tb427.10.15860    | Tb927.10.15860 | Q387S8 | 156 | 3-156                     | Zn binding    |
| <b>TbLAF3</b>  | XF | Tb427.04.4610     | Tb927.4.4610   | Q583E6 | 319 | 120-170, 194-245, 260-317 |               |
| <b>TbLAF4</b>  | XP | Tb427tmp.160.2000 | Tb927.9.3350   | Q38FJ3 | 406 | 35-405                    |               |
| <b>TbLAF5</b>  | XO | Tb427tmp.211.3800 | Tb927.9.12850  | Q38DC9 | 586 | 78-344, 363-440, 453-505  |               |
| <b>TbLAF6</b>  | XC | Tb427tmp.02.3800  | Tb927.11.5990  | Q385G9 | 616 | 1-414, 444-616            |               |

|                |    |                   |                |        |     |                                                           |               |
|----------------|----|-------------------|----------------|--------|-----|-----------------------------------------------------------|---------------|
| <b>TbLAF7</b>  | XH | Tb427.05.2070     | Tb927.5.2070   | Q57ZS6 | 634 | 2-55, 86-113, 184-276, 300-336, 367-412, 471-577, 587-623 |               |
| <b>TbLAF8</b>  | XN | Tb427.08.3300     | Tb927.8.3300   | Q57YY3 | 691 | 58-101, 123-150, 200-668                                  |               |
| <b>TbLAF9</b>  | XI | Tb427.05.3870     | Tb927.5.3870   | Q57U79 | 731 | 25-95, 156-203, 213-289, 319-647, 656-727                 |               |
| <b>TbLAF10</b> | XB | Tb427tmp.52.0011  | Tb927.11.12930 | N/A    | 754 | 47-391, 443-711                                           | MgADP binding |
| <b>TbLAF11</b> | XR | Tb427tmp.211.4580 | Tb927.9.14050  | Q38D50 | 524 | 2-165                                                     |               |

**Supplementary File 3. Contacts of assembly factors with rRNA.** Regions and nucleotides of respective rRNA domains are color-coded as in Fig 4 and Fig EV4.

| Assembly factor | Contacts with rRNA                                           |                                                                                                                                                                        |
|-----------------|--------------------------------------------------------------|------------------------------------------------------------------------------------------------------------------------------------------------------------------------|
|                 | Region                                                       | Nucleotides                                                                                                                                                            |
| mt-EngA         | H74, H75, H88, H90-91                                        | 868-874, 891-898, 958-967, 994-999, 1004                                                                                                                               |
| mt-RbgA         | H90-91                                                       | 1021, 1071                                                                                                                                                             |
| mt-RsfS         | H95                                                          | 1126-1132, 1138-1141                                                                                                                                                   |
| TbLAF2          | H39, H43, H72, H74, H88, H93                                 | 132-135 347-351, 404, 821-829, 832-835, 860-862, 904, 965-677, 985-992, 1079-1082, 1119                                                                                |
| TbLAF3          | H43                                                          | 411-412, 446                                                                                                                                                           |
| TbLAF4          | H39, H90-93                                                  | 351-353, 857-859, 992-994, 1008, 1012-1021, 1071-1087, 1122-1124                                                                                                       |
| TbLAF5          | H43, H90, H95                                                | 409-413, 1020-1021, 1136-1137                                                                                                                                          |
| TbLAF6          | H13, H28, H37, H80-81, H88                                   | 65-66, 164-166, 313, 328, 908, 917-919, 935-939, 944-953                                                                                                               |
| TbLAF7          | H41, H43                                                     | 407, 448-450                                                                                                                                                           |
| TbLAF8          | H95                                                          | 1131-1140                                                                                                                                                              |
| TbLAF9          | H80-81, H88                                                  | 908-909, 915-916, 919-924, 930-940, 952-957, 961                                                                                                                       |
| TbLAF10         | H26, H32, H33, H35a, H37, H39, H51, H72, H73-75, H80-81, H93 | 127-139, 199-200, 270-276, 289-293, 306-316, 344-355, 497, 550, 555, 826-828, 847-848, 850-855, 860-862, 870, 903-922, 930-933, 947-980, 955-965, 983 - 992, 1085-1089 |
